# Supplementary material
Source: MDPI journal article supplement (https://www.mdpi.com/2311-7524/8/8/742)
Supplement: s1 [file s1]

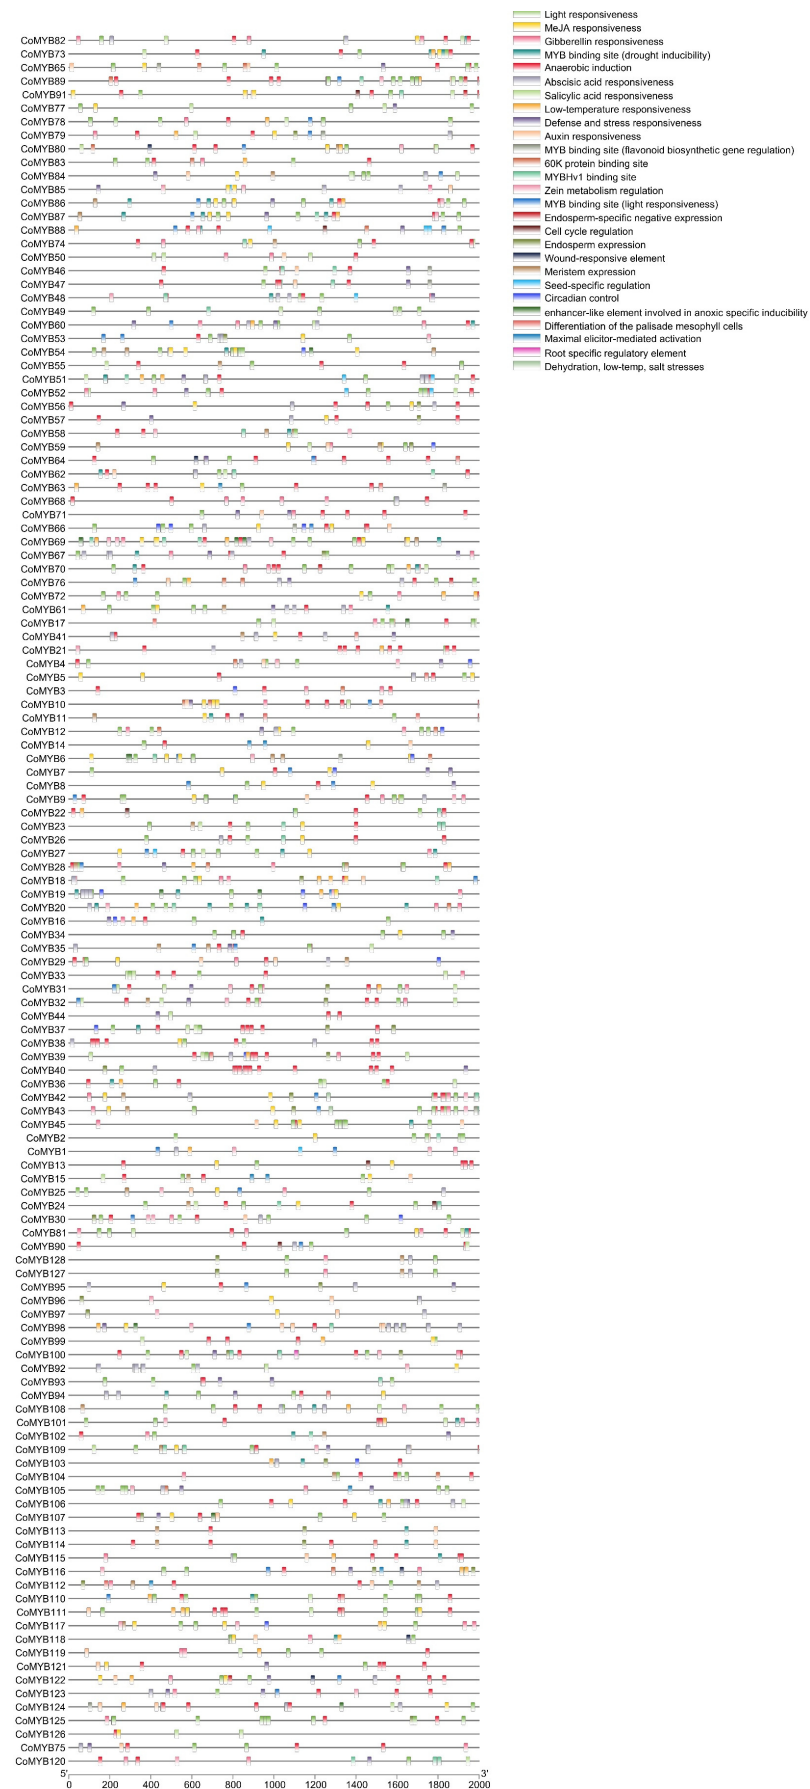

**Figure S2.** Predicted cis-acting elements of promoters of 128 R2R3-MYB genes in *C. oleifera*. Different

colored rectangles represent different cis-acting elements.

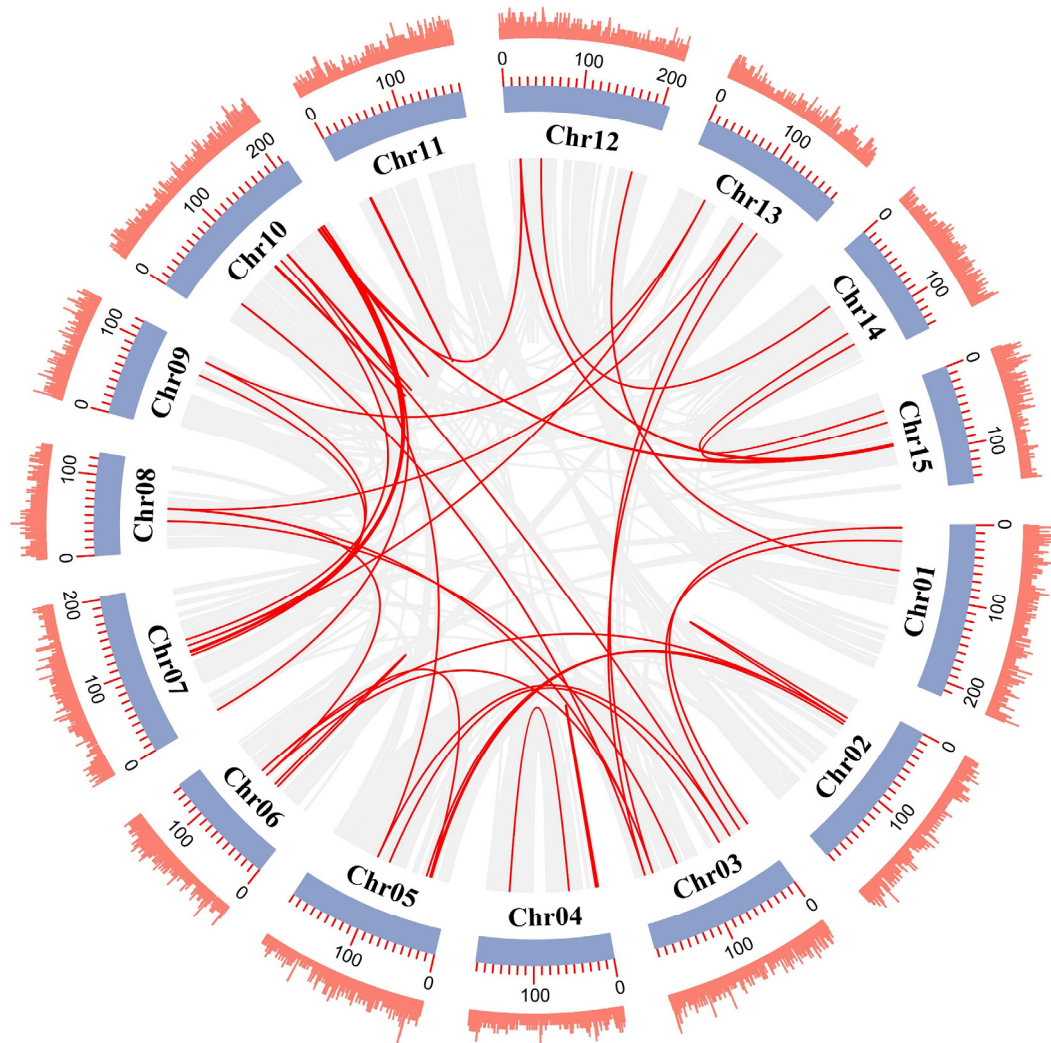

**Figure S3.** Schematic diagram of the colinear relationship within *C. oleifera*. The gray lines in the background represent intergenomic colinear blocks, and the red lines represent intraspecies collinearity *R2R3-MYB* gene pairs. The innermost purple arc represents the chromosome. The red bars in the Circos diagram represent gene density.

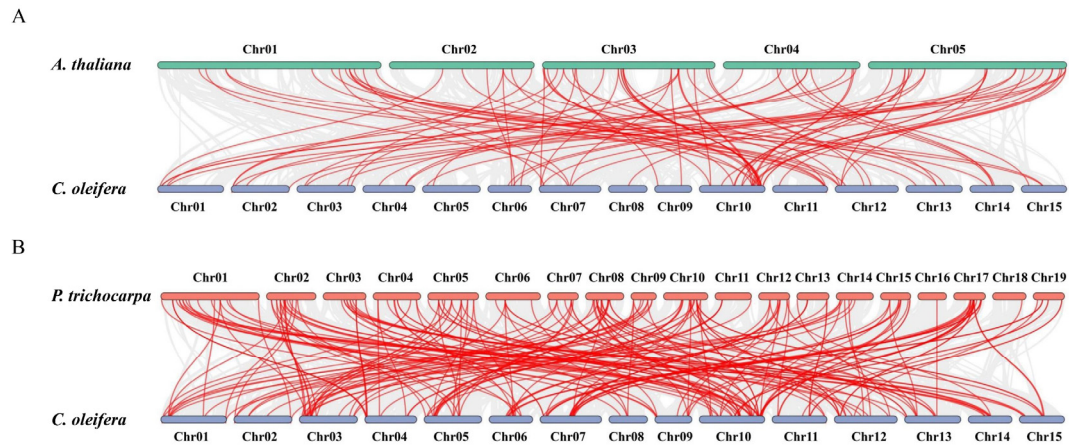

**Figure S4.** Synteny analyses of the *C. oleifera* with Poplar and *Arabidopsis*. **(A)** Schematic diagram of the colinear relationship between *C. oleifera* and *Arabidopsis thaliana*. **(B)** Schematic diagram of the colinear relationship between *C. oleifera* and *Populus trichocarpa*. The gray lines in the background represent intergenomic colinear blocks, and the red lines represent the collinearity of R2R3-MYB gene pairs.

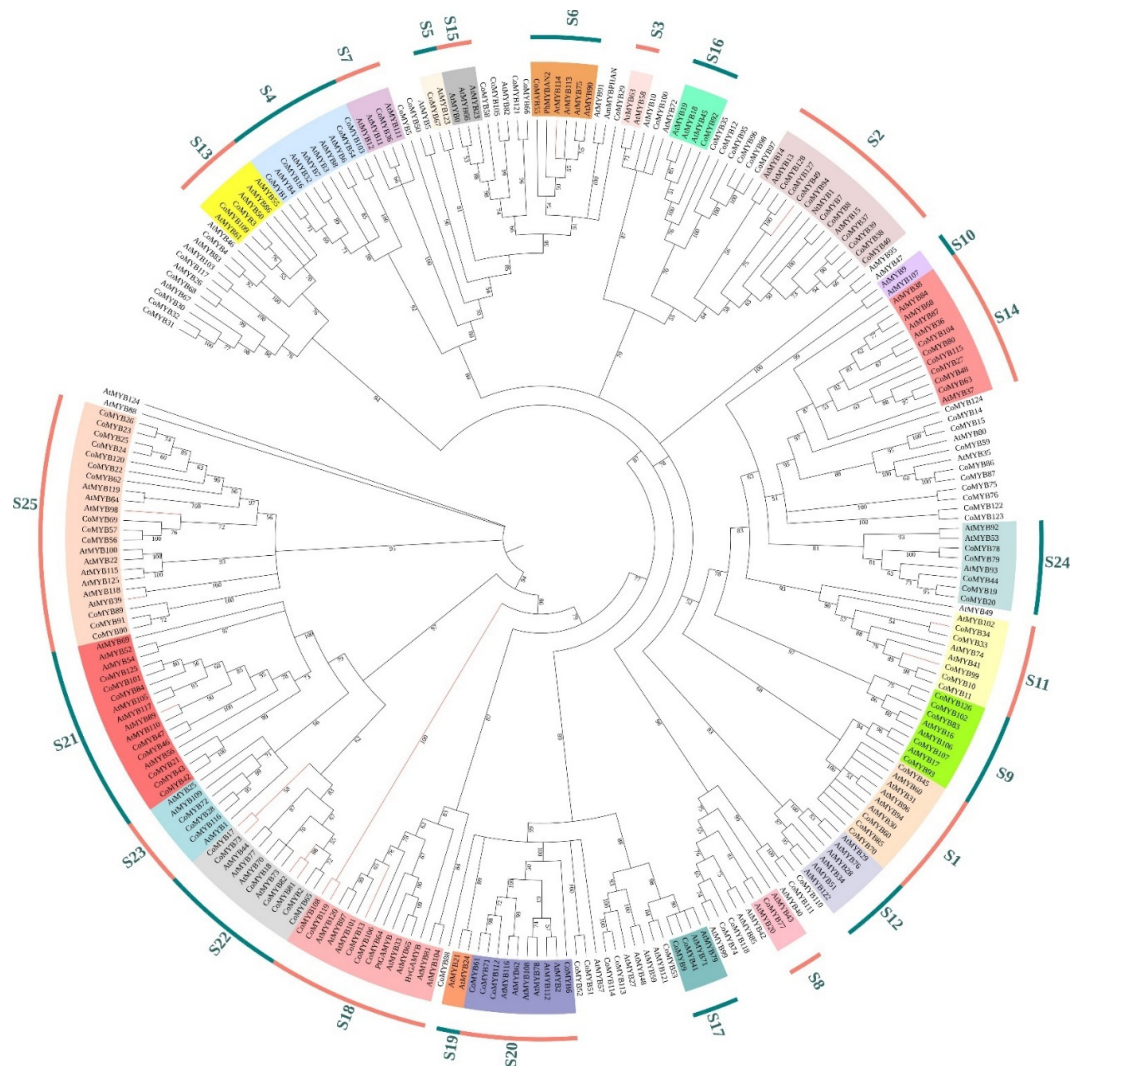

**Figure S5.** Phylogenetic tree of R2R3-MYB transcription factors from *C. oleifera*, *A. thaliana*, and five other



species. The number on the branch represents the bootstrap value. Different colored backgrounds and strips represent different subgroups. The red branches represent genes on this branch that do not have the conserved motif characteristic of this subgroup.

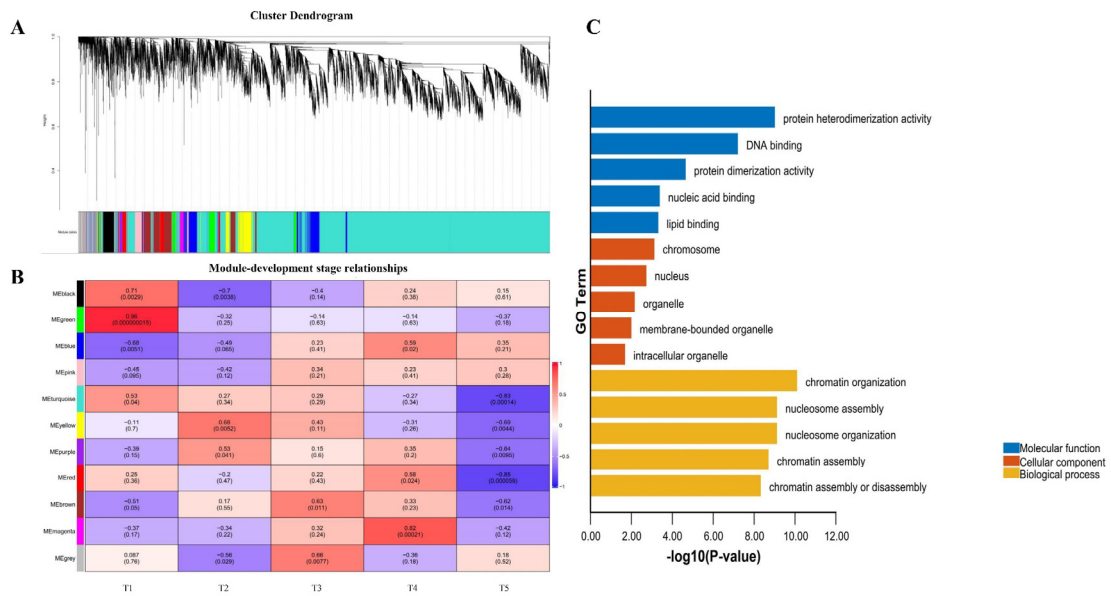

**Figure S6.** Weighted gene co-expression network analysis (WGCNA) of transcriptome and GO enrichment of 7 *CoMYB* genes and their co-expression genes. **(A)** Clustering dendrograms of genes. The 11 co-expression modules are displayed in different colors. **(B)** Correlation analysis of 11 co-expression modules and 5 seed different developmental stages of *C. oleifera*. Red represents a positive correlation, purple represents a negative correlation, and the greater the absolute value, the stronger the correlation. **(C)** GO enrichment of 7 *CoMYB* genes and their co-expression genes. Three colors represent the three parts of GO, respectively.
