# Supplementary material
Source: MDPI journal article supplement (https://www.mdpi.com/2311-7524/8/8/742)
Supplement: s1 [file s1]

Archive with 2 entries (2 files):
- supplementary figures.pdf
- supplementary tables.xlsx
