# Supplementary material
Source: MDPI journal article supplement (https://www.mdpi.com/2311-7524/8/8/742)
Supplement: s1 [file s1 › supplementary tables.xlsx]

## Sheet: Table S1
Table S1. The CoMYBs
3R MYB
1	maker-HiC_scaffold_13-snap-gene-1250.8-mRNA-1
2	maker-HiC_scaffold_3-snap-gene-1734.3-mRNA-1
3	maker-HiC_scaffold_14-snap-gene-1239.24-mRNA-1
4	maker-HiC_scaffold_12-snap-gene-995.8-mRNA-1
5	maker-HiC_scaffold_12-snap-gene-1004.3-mRNA-1
2R MYB
1	maker-HiC_scaffold_15-snap-gene-280.27-mRNA-1
2	maker-HiC_scaffold_10-snap-gene-1376.7-mRNA-1
3	maker-HiC_scaffold_10-snap-gene-1385.38-mRNA-1
4	maker-HiC_scaffold_3-snap-gene-359.16-mRNA-1
5	maker-HiC_scaffold_3-snap-gene-375.35-mRNA-1
6	maker-HiC_scaffold_15-snap-gene-277.6-mRNA-1
7	maker-HiC_scaffold_3-snap-gene-205.3-mRNA-1
8	augustus_masked-HiC_scaffold_10-processed-gene-1785.20-mRNA-1
9	augustus_masked-HiC_scaffold_10-processed-gene-1783.11-mRNA-1
10	genemark-HiC_scaffold_10-processed-gene-2077.75-mRNA-1
11	genemark-HiC_scaffold_10-processed-gene-2080.18-mRNA-1
12	maker-HiC_scaffold_5-snap-gene-1158.13-mRNA-1
13	maker-HiC_scaffold_9-snap-gene-69.3-mRNA-1
14	genemark-HiC_scaffold_3-processed-gene-560.1-mRNA-1
15	genemark-HiC_scaffold_10-processed-gene-2075.18-mRNA-1
16	maker-HiC_scaffold_5-snap-gene-958.26-mRNA-1
17	maker-HiC_scaffold_5-snap-gene-966.1-mRNA-1
18	maker-HiC_scaffold_4-snap-gene-1364.13-mRNA-1
19	maker-HiC_scaffold_10-snap-gene-1975.30-mRNA-1
20	maker-HiC_scaffold_3-snap-gene-1264.29-mRNA-1
21	snap_masked-HiC_scaffold_1-processed-gene-240.42-mRNA-1
22	snap_masked-HiC_scaffold_10-processed-gene-1143.20-mRNA-1
23	snap_masked-HiC_scaffold_14-processed-gene-846.18-mRNA-1
24	maker-HiC_scaffold_2-snap-gene-1026.16-mRNA-1
25	maker-HiC_scaffold_11-snap-gene-972.36-mRNA-1
26	snap_masked-HiC_scaffold_10-processed-gene-1123.48-mRNA-1
27	genemark-scaffold_528_fragment_2-processed-gene-0.1-mRNA-1
28	genemark-scaffold_8_fragment_4-processed-gene-0.3-mRNA-1
29	maker-HiC_scaffold_6-snap-gene-880.29-mRNA-1
30	maker-HiC_scaffold_11-snap-gene-199.32-mRNA-1
31	maker-HiC_scaffold_12-snap-gene-179.51-mRNA-1
32	augustus_masked-HiC_scaffold_3-processed-gene-155.9-mRNA-1
33	snap_masked-HiC_scaffold_10-processed-gene-372.26-mRNA-1
34	snap_masked-HiC_scaffold_7-processed-gene-1096.26-mRNA-1
35	snap_masked-HiC_scaffold_1-processed-gene-39.14-mRNA-1
36	snap_masked-HiC_scaffold_3-processed-gene-1266.14-mRNA-1
37	maker-HiC_scaffold_10-snap-gene-2037.31-mRNA-1
38	maker-HiC_scaffold_10-snap-gene-2020.38-mRNA-1
39	maker-HiC_scaffold_13-snap-gene-410.3-mRNA-1
40	maker-HiC_scaffold_14-snap-gene-648.8-mRNA-1
41	maker-HiC_scaffold_4-snap-gene-477.0-mRNA-1
42	augustus_masked-HiC_scaffold_8-processed-gene-1091.18-mRNA-1
43	maker-HiC_scaffold_5-snap-gene-326.1-mRNA-1
44	maker-HiC_scaffold_9-snap-gene-718.16-mRNA-1
45	maker-HiC_scaffold_5-snap-gene-325.4-mRNA-1
46	maker-HiC_scaffold_15-snap-gene-824.27-mRNA-1
47	augustus_masked-HiC_scaffold_10-processed-gene-442.21-mRNA-1
48	maker-HiC_scaffold_4-snap-gene-75.21-mRNA-1
49	maker-HiC_scaffold_4-snap-gene-58.17-mRNA-1
50	maker-HiC_scaffold_3-snap-gene-1770.5-mRNA-1
51	maker-HiC_scaffold_11-snap-gene-1777.28-mRNA-1
52	snap_masked-HiC_scaffold_4-processed-gene-45.24-mRNA-1
53	maker-HiC_scaffold_2-snap-gene-387.0-mRNA-1
54	maker-HiC_scaffold_7-snap-gene-950.21-mRNA-2
55	maker-HiC_scaffold_7-snap-gene-946.32-mRNA-2
56	maker-HiC_scaffold_2-snap-gene-21.38-mRNA-1
57	maker-HiC_scaffold_10-snap-gene-1988.31-mRNA-1
58	maker-HiC_scaffold_15-snap-gene-797.11-mRNA-1
59	maker-HiC_scaffold_12-snap-gene-812.40-mRNA-1
60	maker-HiC_scaffold_7-snap-gene-46.3-mRNA-1
61	maker-HiC_scaffold_7-snap-gene-53.4-mRNA-1
62	maker-HiC_scaffold_6-snap-gene-549.25-mRNA-1
63	maker-HiC_scaffold_6-snap-gene-607.20-mRNA-1
64	augustus_masked-HiC_scaffold_5-processed-gene-376.4-mRNA-1
65	maker-HiC_scaffold_11-snap-gene-1227.45-mRNA-1
66	maker-HiC_scaffold_9-snap-gene-109.0-mRNA-1
67	maker-HiC_scaffold_11-snap-gene-1231.5-mRNA-1
68	maker-HiC_scaffold_13-snap-gene-1329.16-mRNA-1
69	maker-HiC_scaffold_2-snap-gene-325.24-mRNA-1
70	maker-HiC_scaffold_12-snap-gene-963.18-mRNA-1
71	maker-HiC_scaffold_12-snap-gene-173.3-mRNA-1
72	maker-HiC_scaffold_9-snap-gene-879.2-mRNA-1
73	maker-HiC_scaffold_3-snap-gene-58.1-mRNA-1
74	maker-HiC_scaffold_3-snap-gene-1265.21-mRNA-1
75	maker-HiC_scaffold_3-snap-gene-1267.32-mRNA-1
76	maker-HiC_scaffold_2-snap-gene-1151.65-mRNA-1
77	maker-HiC_scaffold_12-snap-gene-396.17-mRNA-1
78	maker-HiC_scaffold_10-snap-gene-1978.2-mRNA-1
79	maker-HiC_scaffold_15-snap-gene-202.36-mRNA-1
80	maker-HiC_scaffold_1-snap-gene-2153.40-mRNA-1
81	maker-HiC_scaffold_7-snap-gene-171.44-mRNA-1
82	maker-HiC_scaffold_1-snap-gene-1407.4-mRNA-1
83	maker-HiC_scaffold_11-snap-gene-1223.28-mRNA-1
84	maker-HiC_scaffold_2-snap-gene-1022.15-mRNA-1
85	maker-HiC_scaffold_5-snap-gene-54.1-mRNA-1
86	maker-HiC_scaffold_2-snap-gene-433.32-mRNA-1
87	maker-HiC_scaffold_7-snap-gene-991.4-mRNA-1
88	maker-HiC_scaffold_2-snap-gene-1882.24-mRNA-1
89	snap_masked-HiC_scaffold_2-processed-gene-1884.3-mRNA-1
90	maker-HiC_scaffold_11-snap-gene-1222.2-mRNA-1
91	maker-HiC_scaffold_6-snap-gene-1082.22-mRNA-1
92	maker-HiC_scaffold_7-snap-gene-176.32-mRNA-1
93	maker-HiC_scaffold_7-snap-gene-1011.20-mRNA-1
94	maker-HiC_scaffold_5-snap-gene-302.5-mRNA-1
95	maker-HiC_scaffold_9-snap-gene-1092.0-mRNA-1
96	maker-HiC_scaffold_5-snap-gene-301.9-mRNA-1
97	maker-HiC_scaffold_8-snap-gene-432.15-mRNA-1
98	maker-HiC_scaffold_10-snap-gene-2072.64-mRNA-1
99	maker-HiC_scaffold_6-snap-gene-512.7-mRNA-1
100	maker-HiC_scaffold_14-snap-gene-768.53-mRNA-1
101	maker-HiC_scaffold_10-snap-gene-678.2-mRNA-1
102	maker-HiC_scaffold_12-snap-gene-1846.18-mRNA-1
103	maker-HiC_scaffold_13-snap-gene-1034.5-mRNA-1
104	maker-HiC_scaffold_7-snap-gene-956.15-mRNA-1
105	maker-HiC_scaffold_13-snap-gene-1025.4-mRNA-1
106	maker-HiC_scaffold_9-snap-gene-74.16-mRNA-1
107	maker-HiC_scaffold_1-snap-gene-677.0-mRNA-1
108	maker-HiC_scaffold_13-snap-gene-90.22-mRNA-1
109	maker-HiC_scaffold_13-snap-gene-96.22-mRNA-1
110	snap_masked-HiC_scaffold_3-processed-gene-1266.4-mRNA-1
111	maker-HiC_scaffold_12-snap-gene-631.18-mRNA-1
112	maker-HiC_scaffold_6-snap-gene-784.6-mRNA-1
113	maker-HiC_scaffold_10-snap-gene-1250.0-mRNA-1
114	maker-HiC_scaffold_12-snap-gene-1194.8-mRNA-1
115	maker-HiC_scaffold_10-snap-gene-1732.9-mRNA-1
116	maker-HiC_scaffold_4-snap-gene-1384.3-mRNA-1
117	maker-HiC_scaffold_11-snap-gene-1234.2-mRNA-1
118	maker-HiC_scaffold_7-snap-gene-124.2-mRNA-1
119	maker-HiC_scaffold_11-snap-gene-183.12-mRNA-1
120	maker-HiC_scaffold_13-snap-gene-1063.5-mRNA-1
121	maker-HiC_scaffold_3-snap-gene-1647.2-mRNA-1
122	maker-HiC_scaffold_12-snap-gene-482.29-mRNA-1
123	maker-HiC_scaffold_14-snap-gene-826.2-mRNA-1
124	maker-HiC_scaffold_8-snap-gene-617.21-mRNA-1
125	snap_masked-HiC_scaffold_2-processed-gene-1606.10-mRNA-1
126	maker-HiC_scaffold_8-snap-gene-1085.20-mRNA-2
127	maker-HiC_scaffold_4-snap-gene-41.25-mRNA-1
128	maker-HiC_scaffold_15-snap-gene-460.22-mRNA-1
129	genemark-HiC_scaffold_11-processed-gene-667.22-mRNA-1
130	genemark-HiC_scaffold_11-processed-gene-884.54-mRNA-1
131	maker-HiC_scaffold_10-snap-gene-125.2-mRNA-1
132	maker-HiC_scaffold_10-snap-gene-234.47
133	maker-HiC_scaffold_9-snap-gene-1065.4-mRNA-1
134	maker-HiC_scaffold_10-snap-gene-58.7-mRNA-1
135	maker-HiC_scaffold_6-snap-gene-230.11-mRNA-1
136	maker-HiC_scaffold_12-snap-gene-160.1-mRNA-1
137	maker-HiC_scaffold_15-snap-gene-753.19-mRNA-2
1R and MYB related
1	maker-HiC_scaffold_3-snap-gene-1271.5-mRNA-1
2	maker-HiC_scaffold_8-snap-gene-436.14-mRNA-1
3	maker-HiC_scaffold_3-snap-gene-1795.2-mRNA-1
4	genemark-HiC_scaffold_11-processed-gene-453.16-mRNA-1
5	maker-HiC_scaffold_14-snap-gene-1160.8-mRNA-1
6	maker-HiC_scaffold_14-snap-gene-1163.31-mRNA-1
7	maker-HiC_scaffold_11-snap-gene-1222.0-mRNA-1
8	maker-HiC_scaffold_10-snap-gene-2073.56-mRNA-1
9	augustus_masked-HiC_scaffold_8-processed-gene-1154.32-mRNA-1
10	maker-HiC_scaffold_7-snap-gene-438.23-mRNA-1
11	snap_masked-HiC_scaffold_5-processed-gene-296.45-mRNA-1
12	maker-HiC_scaffold_10-snap-gene-58.7-mRNA-2
13	maker-HiC_scaffold_12-snap-gene-1520.9-mRNA-2
14	maker-HiC_scaffold_11-snap-gene-182.5-mRNA-1
15	snap_masked-HiC_scaffold_12-processed-gene-267.43-mRNA-1
16	maker-HiC_scaffold_2-snap-gene-1544.46-mRNA-1
17	maker-HiC_scaffold_7-snap-gene-177.31-mRNA-1
18	maker-HiC_scaffold_15-snap-gene-457.7-mRNA-1
19	snap_masked-HiC_scaffold_7-processed-gene-1211.50-mRNA-1
20	maker-HiC_scaffold_12-snap-gene-827.5-mRNA-1
21	maker-HiC_scaffold_11-snap-gene-1422.28-mRNA-1
22	maker-HiC_scaffold_5-snap-gene-906.53-mRNA-1
23	maker-HiC_scaffold_5-snap-gene-897.15-mRNA-1
24	maker-HiC_scaffold_13-snap-gene-1205.4-mRNA-1
25	maker-HiC_scaffold_5-snap-gene-905.1-mRNA-1
26	maker-HiC_scaffold_14-snap-gene-1149.15-mRNA-1
27	genemark-HiC_scaffold_1-processed-gene-141.3-mRNA-1
28	genemark-HiC_scaffold_12-processed-gene-479.54-mRNA-1
29	snap_masked-HiC_scaffold_7-processed-gene-1190.12-mRNA-1
30	genemark-HiC_scaffold_14-processed-gene-493.49-mRNA-1
31	maker-HiC_scaffold_10-snap-gene-556.24-mRNA-1
32	maker-HiC_scaffold_9-snap-gene-167.24-mRNA-1
33	maker-HiC_scaffold_7-snap-gene-520.0-mRNA-1
34	maker-HiC_scaffold_7-snap-gene-525.27-mRNA-1
35	maker-HiC_scaffold_15-snap-gene-437.26-mRNA-1
36	maker-HiC_scaffold_15-snap-gene-438.49-mRNA-1
37	maker-HiC_scaffold_12-snap-gene-143.33-mRNA-1
38	maker-HiC_scaffold_7-snap-gene-988.29-mRNA-1
39	maker-HiC_scaffold_15-snap-gene-208.3-mRNA-1
40	maker-HiC_scaffold_11-snap-gene-981.34-mRNA-1
41	maker-HiC_scaffold_11-snap-gene-994.10-mRNA-1
42	maker-HiC_scaffold_4-snap-gene-588.0-mRNA-1
43	maker-HiC_scaffold_4-snap-gene-577.26-mRNA-1
44	maker-HiC_scaffold_14-snap-gene-976.11-mRNA-1

## Sheet: Table S2
Table S2. The nine unusual CoMYBs
Gene ID	Identity with MYB consensus
genemark-HiC_scaffold_11-processed-gene-667.22-mRNA-1	0.2
genemark-HiC_scaffold_11-processed-gene-884.54-mRNA-1	0.2286
maker-HiC_scaffold_10-snap-gene-125.2-mRNA-1	0.2286
maker-HiC_scaffold_10-snap-gene-234.47	0.21
maker-HiC_scaffold_9-snap-gene-1065.4-mRNA-1	0.2222
maker-HiC_scaffold_10-snap-gene-58.7-mRNA-1	0.301
maker-HiC_scaffold_6-snap-gene-230.11-mRNA-1	0.2465
maker-HiC_scaffold_12-snap-gene-160.1-mRNA-1	0.3942
maker-HiC_scaffold_15-snap-gene-753.19-mRNA-2	0.3942

## Sheet: Table S3
Table S3. 128 CoR2R3-MYBs information
Gene ID	Gene Name	Squence	Length	Subcellular Location
snap_masked-HiC_scaffold_1-processed-gene-39.14-mRNA-1	CoMYB1	MGRSPCCEKAHTNKGAWTKEEDDRLIAYIRAHGEGCWRSLPKAAGLLRCGKSCRLRWINYLRPDLKRGNFTEEEDELIIKLHSLLGNKWSLIAGRLPGRTDNEIKNYWNTHIRRKLMNRGIDPATHRPINEPAAADVTTISFATAATKEEEEKVISGFSIKEEKSPVRECCPDLNLELRISPPSQNQSDQPLKTTSSVLCFSCSLGIQNSKECSCGDGTSSSNTGYDFLGLKSGVLDYRSLEMK	244	Nuclear
snap_masked-HiC_scaffold_1-processed-gene-240.42-mRNA-1	CoMYB2	MENRSWVMEATQKDVDRIKGPWSTEEDESLQKLVQRHGARNWSLISRFIPGRSGKSCRLRWCNQLSPEVEHRAFSPEEDDLILRAHARFGNKWATISRLLNGRTDNAVKNHWNSTLKRKFPAAMLEGDAGGGGGGGGDERGGQVIRRLESGDVTVGINSESTSASASDGSDSSLQVISHMNVNSNLFRPIARPVESTPVSEMVIPPPPPPTALTLSLFGDSHLYEIHDKNYSPSPRSVTHSRSQSTEFGPSTAAAVEKPMFSTEFLNVMQEMIKKEVRSYLSRGLDQSGMEGSVRNAGVKRIGISRID	308	Nuclear
maker-HiC_scaffold_1-snap-gene-677.0-mRNA-1	CoMYB3	MGRHSCCYKQKLRKGLWSPEEDEKLVRHITKFGHGCWSSVPKLAGLQRCGKSCRLRWINYLRPDLKRGTFSQQEENLIIELHAVLGNRWSQIAAQLPGRTDNEIKNLWNSSLKKKLRQRGIDPNTHKPLSEIENEEKVSATIKNNERASGGSSSHDQLTEKPKVSVAADSYSLIENTPPPPPPPLPPPPTHEFFQERPDMGLSANPNTTLFLNPNSRCSEMISEFNSTVFTSMSSPILTTTTQIKPSISLPSSLGTFDINGIHNWNSGTFSNNGSSSNGSSNSIESSFFDNNNNNFSWVPTADCVKSEKETEIQPIDGDPEEIKWSEYLQTPFLLATTIQNQAAQDIYNETKSESQFVMTHAPSSTNWHQNQQQQQEASQATDLYNKHFQRLAASYGQFS	400	Nuclear
maker-HiC_scaffold_1-snap-gene-1407.4-mRNA-1	CoMYB4	MRKPEAMGKPEKVSKSKVRKGLWSPEEDEKLMKYMMRNGQGCWSDIARNAGLQRCGKSCRLRWINYLRPDLKRGAFSPQEEDLIIHLHSILGNRWSQIAARLPGRTDNEIKNFWNSTIKKRLKNNNFASTSTSSPNNSNSSEEPSRHVIGGTTMSMQEQGNIMNMCMDTFSSSWSMHGMPTPNSFNPFPLPLDNAYDARVTAGLFNIPTWLGHVAMGDGCCEDYGIGEERLSVMGELEGDLSIPSLESRGIVENNGGAADYNLDKKISNNNHLTNNNNNSDEAIIKVEDVFGFGNHWQGENLKMGEWDLDGLLENVSSFPYLDFQVE	327	Nuclear
maker-HiC_scaffold_1-snap-gene-2153.40-mRNA-1	CoMYB5	MGRAPCCSKVGLHRGPWTAREDALLTKYIQLHGEGNWRSLPKKAGLLRCGKSCRLRWMNYLRPDIKRGNISPDEDDLIIKMHALLGNRWSLIAGRLPGRTDNEIKNYWNTHLSKRLLSQGTDPNTHKKISDPHLKEPKKRRSNNKKQKNKTKSNVVVIEKLKAHNPKPTRIKSLSSFSMSRNGSFGWTISGGSSSSHEGDRRGSLLVGTEVVHVPWSDFKDDVDHENRVGFLVGDDHQDRDLVNGSDLECHSQLLPMSDHTLEKLYEEYLQLLKAEDDDQVQLDSFAESLLI	292	Nuclear
maker-HiC_scaffold_2-snap-gene-21.38-mRNA-1	CoMYB6	MEVEGRECNSAIQSEEETMELRRGPWTVEEDMTLMNFIAKHGEGRWNSLARCAGLKRTGKSCRLRWLNYLRPDVRRGNITPEEQLLILELHCRWGNRWSKIAQHLPGRTDNEIKNYWRTRVQKHAKQLQCDVNSKQFKDTMRYLWIPRLVERIQATSTPTATGSSPTTSTTTYHHHPNNISMSSGQLVPPPPPPATSIGGDYGGVQPENSSTGASSDSFGTQVSPVSDLTDYYNYPVNNNHNQDYYQVNQVSYPDSLTSPSGYFNHGLDFQAMEQNNNQWFDAGGDTSDNLWNVEDIWFLQQQLNNNI	308	Nuclear
maker-HiC_scaffold_2-snap-gene-325.24-mRNA-1	CoMYB7	MVRAPCCEKTGLKKGPWTPQEDQILTSYIQQHGHGNWRALPKQAGLLRCGKSCRLRWTNYLRPDIKRGNFSREEEETIINWHEMLGNRWSAIAARLPGRTDNEIKNVWHTYLKKRPKKNYHTTSNNKEQSIAVPKLDSNASIESKSMKFPIPTHLRNESPGYVPSSPQQSSSELSSVTDLAGLPNNMVIKNESETFPQVDGSFWSKKLSAEKSNMKSDFSSIGDELQVLVSSIPAATTTNSTIEHGNNKCSFNIDDDMDFWYNLLIRTGGHLPELPEF	278	Nuclear
maker-HiC_scaffold_2-snap-gene-387.0-mRNA-1	CoMYB8	MVRAPCCEKTGLKKGPWTPQEDQILTSYIQQHGHGNWRALPKQAGLLRCGKSCRLRWTNYLRPDIKRGNFSKEEEETIINWHEMLGNRWSAIAARLPGRTDNEIKNVWHTYLKKRPKNCHTTSNNKEQSITVPKFDSNASIESKSREFPIPTHLRNESPGYVPSSPQQSSSELSSVTDLAGLPNNMVIKNESETFPQVDESFWSKKLSAEKSNMKSDFSSIGDELQVLVSSIPAATTTNSTMEHGNNKCSFNLDDDMDFWYNLLIRTGGHLPELPEF	277	Nuclear
maker-HiC_scaffold_2-snap-gene-433.32-mRNA-1	CoMYB9	MSWGAMAKHLGWDVIEQEWRKGPWTAEEDRLLIEYVKLHGEGRWNSVASLAGLKRNGKSCRFRWVNYLRPDLKRGQITPHEETIILDLHARWGNRWSMIARTLPGRTDNEIKNYWRTHFKKKSKASPNNNEKAKASLMRKQQFQQQQQQQRQKINQVDMKKMMSYLLDENENGVPSLAHQVRQEMATTMNPNTAEEQGLLYSMFIGYAYVPEAPKEDNILWEGLWNLDDNAHGNLGMACAPNKACLQSLATPFY	254	Nuclear
maker-HiC_scaffold_2-snap-gene-1022.15-mRNA-1	CoMYB10	MGRSPCCDKNGTKKGPWTPEEDHKLIQYIQIHGPGNWRTLPKYAGLQRCGKSCRLRWTNYLRPDIRRGRFSFEEEETIIQLHNVLGNKCDHYNTFSLCIFNFLRLRWSAIAAQLPGRTDNEIKNYWNTHIRKRLLRMGIDPVTHSPRLDLLDISSILSSAQLNLSNFLPLQTLVNPELLRLVTTLLASNPENPELLLQELQENQNFNTQLQNQTHLPEPNNLFQTPDQNQTHVLEPNLFQTPIQNQMQFMQGMSMGQFSCQNSQENLTSSLNDLSGNSRFQPMKNNQNFTFDSVMSTSMSSPTPLNSSSTFINSNTNTEGERESYCSSMLKFEVPESLDFVNFM	344	Nuclear
maker-HiC_scaffold_2-snap-gene-1026.16-mRNA-1	CoMYB11	MGRSPCCDKNGTKKGPWTPEEDHKLIQYIQIHGPGNWRTLPKYAGLQRCGKSCRLRWTNYLRPDIRRGRFSFEEEETIIQLHSVLGNKWSAIAAQLPGRTDNEIKNYWNTHIRKRFLRMGIDPVTHSPRLDLLDISSILSSAQLNLSNFLPLQTLVNPELLRLVTTLLASNPENPELLLQELQENQNFNTQLQNQTHLPEPNNLLNDLSGNSRFQPMKNNQNFTFDSVMSTSMSSPTPLNSSSTFINSNTNTEGERESYCSSMLKFEIPESLDFVNFM	278	Nuclear
maker-HiC_scaffold_2-snap-gene-1151.65-mRNA-1	CoMYB12	MVRTPCFDKNGRKKGAWSPEEDNKLRAYIQRYGHWNWRELPKFAGLSRCGKSCRLRWMNYLRPNVKRGNYTKEEEDIIIKLHEALGNKWSAIAAKLPGRTDNEIKNHWHTHLKKRSKQNKSAKIKNQSTGTDSDRSESKADHRERSTEMLKCEANQEVESDDQPCPILESSALFQEPSSSEISSLSSDYAMLSGGVNWALEDSLSSLDSFAEPIENFWTQPFLADTYCDDENNFSSNFVEGGFVSPFDSYYDDDSMDFLSQVLQELPKS	269	Nuclear
snap_masked-HiC_scaffold_2-processed-gene-1606.10-mRNA-1	CoMYB13	MVSSSRSSSGGGVGGGCPQLAVRKGPWTTAEDAILIEYVRKHGERKWNAVRKNYGLLRCGKSCRQRWTNHLRPNLKKGAFTPEEKKTIIDLHARLGNKWARMASKMV	107	Mitochondrial
maker-HiC_scaffold_2-snap-gene-1882.24-mRNA-1	CoMYB14	MGRIPCCEKDNVKRGQWTPEEDNKLSSYIAQHGTRNWRLIPKNAGLQRCGKSCRLRWTNYLRPDLKHGQFSDAEEQTIVKLHSVVGNRWSLIAAQLPGRTDNDVKNHWNTKLKKKLSGMGIDPVTHKPFSHLMAEIATTLAPPQVAHLAEAALGCFKDEMLHLLTKKRIDFQFQQSSIAPGNTATATYTTSNQDEKDDTIEKIKLGLSRAIQEPNMSPSNKPWDSTGACSAFPASVSGFQYGPPSFGNEGDGSPWNQSICTGSTCTAGDQQGRMHEKLEDEDRDESEGGKGTRNGSSIFNSECVLWDIPSDDLMNPI	317	Nuclear
snap_masked-HiC_scaffold_2-processed-gene-1884.3-mRNA-1	CoMYB15	MGRIPCCEKDNVKRGQWTPEEDNKLSSYIAQHGTRNWRLIPKNAGLQRCGKSCRLRWTNYLRPDLKHGQFSDAEEQTIVKLHSVVGNRWSLIAAQLPGRTDNDVKNHWNTKLKKKLSGMGIDPVTHKPFSHLMAEIATTLAPPQVAHLAEAALGCFKDEMLHLLTKKRIDFQFQQSSIAPGNTATATYTTSNQDEKDDTIEKIKLGLSRAIQEPNMSPSNKPWDSTGACSAFPACVSGFQYGPLSFGNEGDGSPWNQSICTGSTCTAGDQQGRMHEKLEDENGDESEGGKGTRNRSSIFNSECVLWDIPSDDLMNPI	317	Nuclear
maker-HiC_scaffold_3-snap-gene-58.1-mRNA-1	CoMYB16	MGRSPCCEKAHTNKGAWTKEEDERLISYIGAYGEGCWRSLPKAAGLLRCGKSCRLRWINYLRPDLKRGHFTPEEDELIINLHSLLGNKWSLIAGKLAGRTDNEIKNYWNTHLRRNLLSRGIDPVTHRPLNEPTTTTSTSNSTTLIFSAVEDKKEGEENYEVIIGCQEQKNTSQEQCPPHLNLELRISLPSHHPPPQLPSKGIGKSLCFSCRLGLFNNKECTCCINRDDLVSLNTGVVDYVNFSQQ	245	Nuclear
augustus_masked-HiC_scaffold_3-processed-gene-155.9-mRNA-1	CoMYB17	MSNRAEKIKGPWSAEEDKILTRLVDHYGARNWSLISKYIKGRSGKSCRLRWCNQLSPNVEHRPFSQAEDETILAAHSQYGNRWATIARLLPGRTDNAVKNHWNSTLKRRQQQPMERMDGGDLVVGGGGSSSGSGSFVNMNSDESDPMTTLSLAPPGVGGCGMPERRRGEEVPAEFWDVMREVIAREVRDYVTTSFPEASGFR	202	Nuclear
maker-HiC_scaffold_3-snap-gene-205.3-mRNA-1	CoMYB18	MASLSRKDVDRIKGPWSPEEDELLQTLVQRHGPRNWSLISKSIPGRSGKSCRLRWCNQLSPQVEHRAFTAEEDETIMKAHAKFGNKWATIARLLSGRTDNAIKNHWNSTLKRKCSSMSDDFNFPDGSHSHQPLKRSASVGPGTNVSGLYLNPSSPSGSDLSDSSFSGFPSAQVFRPVPLTGGVPPPVHQIETASTNCIGSSDLPHPILTRIRFLRPVQSNRYSAGATTGRPKHRFWGGDCQEFLAVMQEMIKEEVRSYMSGIEQNGRCLQAEAIRNASGEENWD	284	Nuclear
maker-HiC_scaffold_3-snap-gene-359.16-mRNA-1	CoMYB19	MGRSPSDENGLKKGPWTPEEDQKLVDYIHKHGHGSWRALPNLAGLNRCGKSCRLRWTNYLRPDIKRGKFSQEEEQTILHLHSILGNKWSAIATHLPGRTDNEIKNFWNTHLKKKLIQMGFDPMTHRPRTDLFATLPHLIALANLRELIDQPPLEQQAVKLQAEAIQFAKIQYLQHLIQSSASPHIQNNITDIENLSLLNSMPPIKENPFLNSTQVLQNQALFGIENATSQPLHYPIMNSSSDPQVPFNFQTPLNSEMGQGINNATIMISQGDDHNHNHNNPPHSPWILPSPSSSSGHRLPMLSESLVSNPGDASSSSSHGGGGGGDGSSSYWPELLFDESFMHEIC	346	Nuclear
maker-HiC_scaffold_3-snap-gene-375.35-mRNA-1	CoMYB20	MGRSPSDENGLKKGPWTPEEDQKLVDYIHKHGHGSWRALPNLAGLNRCGKSCRLRWTNYLRPDIKRGKFSQEEEQTILHLHSILGNKWSAIATHLPGRTDNEIKNFWNTHLKKKLIQMGFDPMTHRPRTDLFATLPHLIALANLRELIDQPPLEQQAVKLQAEAIQLAKIQYLQHLIQSSASPHIQNNITDIENLSLLNSMPPIKENPFLNSTQVLQNQALFGIENATSQPLHYPIMNSSSDPQVPFNFQTPLNSEMGQGINNATIMISQGDDHNHNHNNPPHSPWILPSPSSSSGHRLPMLSESLVSNPGDASSSSSHGGGGGGDGSSSYWPELLFDESFMHEIC	346	Nuclear
genemark-HiC_scaffold_3-processed-gene-560.1-mRNA-1	CoMYB21	MDETLGGSSDDTRTCPRGHWRPAEDEKLRQLVEQYGPQNWNSIAEKLQGRSGKSCRLRWFNQLDPRINRRPFTEEEEERLLAAHRIHGNKWALISRLFPGRTDNAVKNHWHVIMARKQREQSKLCGKRIYQDTIDSSSNAPPSFGFRRRNSRTQEDYSLKCHFEGIKFFEFQTLNKDRIFPVSPSSSSPSWNFTRPTASATNNSPSVDLFGREGTDYINSSTYYCTTDSSNSSDQPLYRYGCRDFSPFGVPNYKRVVPSPFGYSKLGDGNRAHEVIKRDLVSFGDNLHPFAKIRRAIDEEENRNESVKQKDNIPAFIDFLGVGIS	325	Nuclear
maker-HiC_scaffold_3-snap-gene-1264.29-mRNA-1	CoMYB22	SPSSLSFMEGGGGGGFGYVNLQNNPSLYRPSPPLTAMERFLSSKNNHFSHQQTQNNVHNQGLLVPTSVYGGFSSSGGAIGGYSSNFLGPSFPEKSFIDGLFHDSESPKWTYEIDPNMGLSEDAKSKERNCKGVAKRAKDGSSTTTLIKGQWTDEEDRKLLNLVTQHGVRKWAQIAENMVGRAGKQCRERWHNHLRPDIKKDTWTEEEESILVEAHKKVGNRWAEIAKRIPGRTENSIKNHWNATKRKQNSKRNNIKKPQGSQNGKSQSQPSILQDYIKSMNPSNRAATTTGSTVTEDFSTHFAPPRDLSESSIDDSPQFMNKTIDDELNFMINFFGTKNDQPLNDKNNSNASIEAKIAQNNHSKSVSALNPLGLLNNTNGDDQLLNDMVVDTNMFINAP…	420	Nuclear
maker-HiC_scaffold_3-snap-gene-1265.21-mRNA-1	CoMYB23	SPSSLSFMEGGGGGGGFGYVNLQNNPSLYRPSPPLTAIEMFWSSKNNHFSHQQTQNNVHNQGLLVPASVYGGFSSSGGAIGGYSSNFLGPSFPEKSFIDGLFHDSETLKWTYEIDPNMGLSEDAKSKERNCKGVAKRAKGGSSTTTLIKGQWIDEEDRKLLNLVTQHGVRKWAQIAKNMVGRAGKQCRERWHNHLRPDIKKDTWTEEEESILVEAHKKVGSRWAEIAKRIPGRTENSIKNHWNATKRKQNSKRNNIKKPQGSQNGKSQSQPSILQDYIKSMNPSKRAATTTGSTVTKDFSTHFAHLGDLSESSIDDSPQFMNKTFDDELNFMINFFGTKNDQPLNGKNNSKASIKAKTAQNNHSKSVSALNPLGLLNNTNGDDQLLNDMVVDTNMFINA…	421	Nuclear
snap_masked-HiC_scaffold_3-processed-gene-1266.4-mRNA-1	CoMYB24	MEGGGGGGGFGYVNLQNNPSLYRPSPPLTATEMFLSSKNNHFSHQQTQNNVHNQGLLVPANVYGGFSSSGGAIGGYSSNFLGPSFPEKSFIDGLFHDSETLKWTYKIDPNMDLSEDAKSKERNCKGVAKRAKGGSSTTTLIKGQRTDEEDRKLLNLVTQHGVRKWAQIAKNMVGRAGKQCRERWNNHLRPDIKKDTWIEEEESILVEAHKKVGNRWAEIAKRISGRTENSIKNHWNATKRKQNSKRNNIKKPQGSQNGKSQSQPSILQDYIKNMNPSKRAAVDAPERPGRAKSRSVHIGVTTVRTRFVSVLNLNQIVQLWQIVLKKNRFLKRSAKHGLLCQTTESPPKYFKMGNLGNPDSVPKATCPSLPKCLGSGAWVRSGKVSYEHPLSPGPKTGLY	399	Nuclear
snap_masked-HiC_scaffold_3-processed-gene-1266.14-mRNA-1	CoMYB25	MEGGGGGGGGFGYVNLQNNPSLYRPSPPLTAIKMFLSSKNNHFSHQQTQNNVHNQGLLVPASVYGGFSSSGGAIGGYSSNFLGPSFPEKSFIDGLFHDSETLKWTYEIDPNMGLSEDAKSKERNCKGVAKRAKGGSSTTTLIKRQWTDEEDRKLLNLVTQHGVRKWAQIAKNMVGRAGKQCRERWHNHLRPDIKKDTWTEEEESILVEAHKKVGNRWAEIAKRIPGRTENSIKNHWNATKRKQNSKRNNIKKPQGSQNGKSQSQPSILQDYIKNMNPSKRAATTTGSTVTKDFSTHFAHLGDLSESSIDDSPQFMNKTFDDELNFMINFFGTKNDQPLNGKNNSKASIKAKTAQNNHSKSVSALNPLGLLNNTNGDDQLLNDMVVDTNMFINAPNKELP…	415	Nuclear
maker-HiC_scaffold_3-snap-gene-1267.32-mRNA-1	CoMYB26	SPSSLSFMEGGGGGGGFGYVNLQNNPSLYKPSPPLTAIEMFLSSKNNHFSHQQTQNKVHNQGLLVPASVYGGFSSSGGAIGGYSSNFLGPSFPEKSFIDGLFHDSETFKWTYEIDPNMGLSEEAKSKERNCKGVSKRAKGGSSTTTLIKGQWTDEEDRKLLNLVTQHGVRKWAQIAKNMVGRAGKQCRERWHNHLRPDIKKDTWIEEEESILVEAHKKVGSRWAEIAKRIPGRTENSIKNHWNATKRKQNSKRNNIKKPQGSQNGKSQSQPSILQDYIKSMNPSKRAATTTGSTVTKDFSTHFAHLGDLSESSIDDSPQFMNKTFDDELNFMINFFGTKNDQPLNGKNNSKASIKAKTAQNNHSKSVSALNPLGLLNNTNGDDQLLNDMVVDTNMFINA…	421	Nuclear
maker-HiC_scaffold_3-snap-gene-1647.2-mRNA-1	CoMYB27	MGRAPCCDKENVKRGPWAPEEDAKLKEYIEKHGTGGNWIALPQKAGLRRCGKSCRLRWLNYLRPNIKHGEFSDNEDRIICTLFASIGSRWSIIAAQLPGRTDNDIKNYWNTKLKKKLMKIGIGIVPSSPNQRRPHHHQPTTYPFISLLHHNSSSSPSPSPSPSSPLSSSSSYKYHNTQTSSFIGYDFEPFSIPSSSTTNSTVLQAQEGFVSPNLLFCGEAASCSSSDGSFNNNNQISHGREMESDYGGHMGLQSYYHLYNGVGENLKYMVSSGVGGGNANNGLFYGGESETPIDYSSVEEIKQLINTNTNIYNNMNFYVDDNKREEKVMQYK	332	Nuclear
maker-HiC_scaffold_3-snap-gene-1770.5-mRNA-1	CoMYB28	MPTDSEIDDVTVVVAAADGGDIEEKNEDIDMAVVGGGEGSGSSGGQAGKKSRDRVKGPWSPEEDAILSRLVSNFGARNWSLIARGIAGRSGKSCRLRWCNQLDPAVKRKPFTDEEDRIIVRAHAIHGNKWASIARLLPGRTDNAIKNHWNSTLRRRCTERRKFKLESSNMLEDFSMDISKASSEETLSCGDVNSFNSLEGKDVTSRENIEELCEDKAQPEGQSTNEAKQPPTLFRPVARVSAFNVYNILDGPETVSSFPSSIPMQGPLVQVSRPDVGIYKLLEGAYGDRLIPHQCAHGCCGTESKGKPQSSLLGPEFVDYAEPQFFPCHELAAIATDISNAAWQKSGLESVNVRAASVGPLVQMGHVVDSKMKGHLHFKEGKNKLMGLMADPLSTPTGR…	412	Nuclear
maker-HiC_scaffold_4-snap-gene-41.25-mRNA-1	CoMYB29	MSHPTTNGLRKGCWAEEEDRLLRKYVETFGEGNWKHIPTKAGKNQTPFSFSFPFHSLLSLLRWLNYLRPNIKRGDFGVDEDDLIIKLHRLLGNRQCRWSLIAGRIPGRTANDIKNYWNSCLSKKASTSDSKITSSLETQSAMNLEPLEGEFQSSSDRKTEGEEEEDEEDTALFWRSLLLEGVLKETRKLSVKNKEKKVQDDDFFQGLGDLVQDMEILGGSE	221	Nuclear
snap_masked-HiC_scaffold_4-processed-gene-45.24-mRNA-1	CoMYB30	MGHHCCSKQKVKRGLWSPEEDEKLIRHITTHGHGCWSSVPKLAGLQRCGKSCRLRWINYLRPDLKRGTFTEQEERIIIDVHRILGNRWAQIAKHLPGRTDNEVKNFWNSCIKKKLIAQGLDPNTHNLLSSSNRTANKVLPHTHHQQNTSVFSITTSQTNDMKTPLVTLVPPSDTNSINHIPISLHEYQSPSFAPTTRNQSGHSLMEFANSTDHLSHTFLMLSRQYGTKGCTGSETDGPMPFGTRSSMETTTVPSSSMNNVYGFGCIDENSMWGSDLEHFDPTRGEMVMQIQEQQHPQQEKGCEGEADKVNESISSGQNMGTSLMESSNFDFEFVESALLPCGMYCNVNPMDPLAWDC	356	Nuclear
maker-HiC_scaffold_4-snap-gene-58.17-mRNA-1	CoMYB31	MGHHCCSKQKVKRGLWSPEEDEKLITHISSHGHGCWSSVPKLAGLQRCGKSCRLRWINYLRPDLKRGSFTEQEERIIIDVHRILGNRWAQIAKHLPGRTDNEVKNFWNSCIKKKLISLGLDPNTHNLLSPHQTTTNATKYSHNNQKQQNTSAFSITSHGNDASTDTKTPFATFPSLPSSHTSSTSTNPNNPISLYENSTITTASTFEYQNPRNQIVNSLMHASLHQLVSEPCIKFASRPLMERTQFLSSTLNPSGFGAIDENCMWGTNSEPFGVMQPQQEKTCEGDQMDKVDINMDNSLIESSNFDFEFVESGLLPCGMYCNVSPMDQLAWDC	333	Nuclear
maker-HiC_scaffold_4-snap-gene-75.21-mRNA-1	CoMYB32	MGHHCCSKQKVKRGLWSPEEDEKLITHISSHGHGCWSSVPKLAGLQRCGKSCRLRWINYLRPDLKRGSFTEQEERIIIDVHRILGNRWAQIAKHLPGRTDNEVKNFWNSCIKKKLISLGLDPNTHNLLSPHQTTTNATKYSHNNQKQQNTSAFSITSHGNDASTDTKTPFATFPSLPSSHTSSTSTNPNNPISLYENSTITTASTFEYQNPRNQIVNSLMHASLHQLVSEPCIKFASRPLMERTQFLSSTLNPSGFGAIDENCMWGTNSEPFGVMQPQQEKTCEGDQMDKVNINMDNSLIESSNFDFEFVESGLLPCGMYCNVSPMDQLAWDC	333	Nuclear
maker-HiC_scaffold_4-snap-gene-477.0-mRNA-1	CoMYB33	MGRTPCCEKNGLKKGPWTPEEDQKLIDYIQKNGYGNWRTLPKNAGLQRCGKSCRLRWTNYLRPDIKRGRFSFEEEETIIQLHIILGNKWSAIAARLPGRTDNEIKNYWNTHIRKRLLRMGIDPVTHNPRLDLLDISSILSSSFYNNSSQMNLSRFLGVQTPLLNPELLRIATSLLTSHRENPNLILQNVQENQLCNPQVQNQMPQLVQPNQLQTLIDQEISTCNIPFPNEAQLMEPNVDQFSSNFTNFSSQNCQLNDWQSNGMASSLGEYYMSLPNYEYYGSDQSIIENPNPSENSNFQSNNSNNFSFASVLSTMSSPSSSPAPLNSNSTYINSGSTTTTEDERESYCSGMLKF	354	Nuclear
maker-HiC_scaffold_4-snap-gene-1364.13-mRNA-1	CoMYB34	MGRTPCCEKNGLKKGPWTPEEDQKLIDYIQKHGYGNWRTLPKNAGLQRCGKSCRLRWTNYLRPDIKRGRFSFEEEETIIQLHSILGNKWSAIAAQLPGRTDNEIKNYWNTHIRKRLLRMGIDPVTHRLRLDLLELSSILSSSLHNSSQMNLSRLLGLQQPLVNPEILRLASSLLSSQQCENPNPNFLLQHVQENQVCSPNQVQNQLVLPNQNQTLIQEIEENQEIPVCTTLSTPCVPFASDAQLMEPNVHQFSSNLTDFSPQNCQLNHWQSHEMPSNLTEDYGALSSYGYYASDQSIMDPHPSDQNSNFQSYNSNNFSFASGLSTLTTPSSSPAPLNSNSTYINSSSTVTEDERESYCSGMLKFEIPDMLDVSEYM	376	Nuclear
maker-HiC_scaffold_4-snap-gene-1384.3-mRNA-1	CoMYB35	MMCGCVCLSLYINSFLEGLGNSSKLGYNLTEMMRTLHFDKKTLKKGAWSREEDQKLINYINKYRIWIWSEMPKAAGLLRSGKSCRLRWVNYLKPGIRRGNFTREEEETILNMHEMLGNKWSTIAAALPGRTDNEIKNYWHSRLKKRLRKPRTQSQASSSTEVSEGPRNVPDSAQPPFSVCLSPNTGPAVWINENQNIEANLGSKLETFDGLLSLCENQNIEENLFLENLQEMFENPGFALPQCELWFSEPTSPYGFYHDPWFNFNLSVQSDMAVKEPNLCRKMIVGKGIGD	291	Nuclear
maker-HiC_scaffold_5-snap-gene-54.1-mRNA-1	CoMYB36	MGRAPCCEKVGLRKGRWTAEEDQTLIKYIQSNGEASWRALPKNAGLLRCGKSCRLRWVNYLRGNLKRGNITAEEETTIVKLHASLGNRWSLIASHLPGRTDNEIKNYWNSHLSRKIYYKIPNGESVHTSSIPTAKMAATFKPSQRGRVSRLRLPKSTRRKYHLLPM	166	Mitochondrial
maker-HiC_scaffold_5-snap-gene-301.9-mRNA-1	CoMYB37	MGRAPCCEKMGLKKGPWTAEEDQLLIAFIRQHGHGNWRALPKQAGLLRCGKSCRLRWTNYLRPDIKRGNFSKEEEDTIINLHEMLGNRCVFFPALSLINSILLETIWSAIAARLPGRTDNEIKNVWHTHLKKRLKNYQSTSNTKGQTVTEPKCDSNASSESNTMNSGFESSEYASVSPQDSSSELSSVTDLTGLPNNVVIKDESMDTSETFPQIDESFWSEELSTGNSTMQSDFAGFAEELQFQFPLSPSISASFGTMEHVNEYNFNIDDDMGFWYNLLIKAGGLPELSEI	291	Nuclear
maker-HiC_scaffold_5-snap-gene-302.5-mRNA-1	CoMYB38	MGRAPCCEKIGLKKGPWTAEEDKLLIAFIRQHGHGNWRALPKQAGLLRCGKSCRLRWTNYLRPDIKRGNFSKEEEDTIINLHEMLGNRCVFFSALSLINSILLESIWSAIAARLPGRTDNEIKNVWHTHLKKRLKNYQSTSNTKGQTVTEPKCDSNASSESNTMNSGFEGSEYASVSPHDSSSELSSVTDLTGLPNNVVIKDESMDASETFPQIDESFWSEELSTGNSTMQSDFAGFAEELQFQFPLSPSMTASIGTMEHVNEYNFNIDDDMEFWYNLLIKAGGLPELSEI	291	Nuclear
maker-HiC_scaffold_5-snap-gene-325.4-mRNA-1	CoMYB39	MGRAPCCEKMGLKKGPWTAEEDQLLIAFIRQHGHGNWRALPKQAGLLRCGKSCRLRWTNYLRPDIKRGNFSKEEEDTIINLHEMLGNRWSAIAARLPGRTDNEIKNVWHTHLKKRLKNYQSTSNTKGQTVTEPKCDSNASSESNTMNSGFESSEYASVSPQDSSSELSSVTDLTGLPNNVVIKDESMDTSETFPQIDESFWSEELSTGNATMQSDFAGFAEELQFQFPLSPSMTASFGTMEHVNEYNFNIDDDMEFWYNLLIKAGDLPELSEI	273	Nuclear
maker-HiC_scaffold_5-snap-gene-326.1-mRNA-1	CoMYB40	MGRAPCCEKMGLKKGPWTAEEDKLLIAFIRQHGHGNWRALPKQAGLLRCGKSCRLRWTNYLKPDIKRGNFSKEEEDTIINLHEMLGNRWSAIAARLPGRTDNEIKNVWHTHLKKRLKNYQCTSDTKGQTVTEPKCDSNASSESNTMNSGFEGSEYASVSPHDSSSELSSVRDLTGLPNNVVIKDESMDASETFPQIDESFWSEELSTGNSTMQSDFAGFAEELQFQFPLSPSMTASIGTMEHVNEYNFNIDDDMEFWYNLLIKAGGLPELSEI	273	Nuclear
augustus_masked-HiC_scaffold_5-processed-gene-376.4-mRNA-1	CoMYB41	MSWGVMAQHLGWGVIQEEGWRKGPWTAEEDRLLTEYVKLHGEGRWNSVARLAGLKRNGKSCRLRWVNYLRPDLKRGQITPHEETIILELHARWGNRWSTIARSLPGRTDNEIKNYWRTHFKKKAKSDNNEKAKTRLLRRQQFQQQQRQPQQQPQQQQQINQVDMKKIMSLFDESDNRVPSSLPHQVRQDMVTLYPNTTVEEQASFLYPQFNGYASGLESTNEDNMVLWDGLWNLDDHVYGNLSMACAANKTGLHHTLATPFY	262	Nuclear
maker-HiC_scaffold_5-snap-gene-958.26-mRNA-1	CoMYB42	MDESTGGGGSSDDARTCPRGHWRPAEDEKLRQLVEQYGPQNWNSIADKLQGRSGKSCRLRWFNQLDPRINRRPFTEEEEDRLLAAHRIHGNKWALISRLFPGRTDNAVKNHWHVIMARKQREQSKLCGTKRSYQDAINGGDDSSNTLSYGFRRRNSKTQQEDYSSKTRFESCQFFEFQTPNKERIFTVLPNLPPSSSSSPSWNFTRPTISAANNSGDLFGREGRDFFNPSSNYCSTESSNSTSEQALRRYYLNPSACRDFSPFGFPNYKRVVPSSFGYSKLGDGNGTHGMFKKELVRFGENSHPFEKKIETIDEHENGDKNSIKQKDVPFIDFLGVGISS	340	Nuclear
maker-HiC_scaffold_5-snap-gene-966.1-mRNA-1	CoMYB43	MDESTGGGGSSDDARTCPRGHWRPAEDEKLRQLVEQYGPQNWNSIADKLQGRSGKSCRLRWFNQLDPRINRRPFTEEEEDRLLAAHRIHGNKWALISRLFPGRTDNAVKNHWHVIMARKQREQSKLCGTKRSYQDAINGGDDSSNTLSYGFRRRNSKTQQEDYSSKTRFESCQFFEFQTPNKERIFTVLPNLPPSSSSSPSWNFTRPTISAANNSGDLFGREGRDFFNPSSNYCSTESSNSTSEQALRRYYLNPSACRDFSPFGFPNYKRVVPSSFGYSKLGDGNGTHGMFKKELVRFGENSHPFEKKIETIDEHENGDKNSIKQKDVPFIDFLGVGISS	340	Nuclear
maker-HiC_scaffold_5-snap-gene-1158.13-mRNA-1	CoMYB44	MGRSPSCDEKYELKKGPWTPEEDQKLVDCIQKHGLGSWSAFPKLAGLNRCGKSCRLRWTNYLRPDIKRGKFSQEEEQTILHFHSILGNKWSAIATHLPGRTDNEIKNFWNTHLKKKLIQMGFDPMTHQPRTDLFANLPHLIAMANLRDLINQPLLEADQLANLQYLQHLLQFADSSSVTSSPYSQNSITDHIDALSLWNSIPPLKQNPVLNSSYSTQVLQNQALFSIENATSSQPLHHNNPIITSLNIPVSDPQVPFCFQTPLNSGINPAMISHEDDKPPNSPWLLPSPTSSGTLPISEVSISNPGDGCSVSSYGGGGASSSCWTELLFEEPFMHEIS	338	Nuclear
maker-HiC_scaffold_6-snap-gene-512.7-mRNA-1	CoMYB45	MGRPPCCDKVGIKKGPWTPEEDIILVSYIQEHGPGNWRSVPTNTGLLRCSKSCRLRWTNYLRPGIKRGNFTPHEEGMITHLQALLGNKWAAIASYLPQRTDNDIKNYWNTHLKKKMKKLQTALEPQIASSDSASYPFVSKSFIDHKRTIDTTTCSSHASSSTTYASSTENISRLLEGWMRSSPKTNASLMNSEMHQNNNNLDNNSIDGSSFASASACASAAASLQSGSRHRLPKSEQESGDHLGSNEMLEPPLSFLENWLLGESVGQVEEMMELPAIF	278	Nuclear
maker-HiC_scaffold_6-snap-gene-549.25-mRNA-1	CoMYB46	MNLQHMNNNGAHDIHGFRDINFLIPPPPGQLSLSMNHLGERNGYHQILNPPFQNKPWSFVPMEEGRETDDGTDMGSGGIDRNGLDLDQGDDEDSIEKKFGRTKLCARGHWRPHEDSKLKELVTQYGPQNWNLIAEKLQGRSGKSCRLRWFNQLDPRINKRAFSEEEEERLLAAHRMYGNKWAMIARLFPGRTDNAVKNHWHVIMARRHREQNTVYRRRKPSSSCSPKGFDGMIVINGYNNHLNNACSESTISSANIDESGSTCTDLSLTPSSTIVPPGFGFVSRIVSPVLQHHQPYGLQMAGERKVLTVGNVGLDQFCSGGNVVYHGGPMTNVVVDVYQPGNSDSNSEVSASESVANNNQANNNPYRENESGGNEEKNRMAFIDFLGVGAT	391	Nuclear
maker-HiC_scaffold_6-snap-gene-607.20-mRNA-1	CoMYB47	MNLQHMNNNGAHDIHGFRDINFLIPPPPGQLSLSMNHLGERNGYHQILNPPFQNKPWSFVPMEEGRETDDGTDMGSGGIDRNGLDLDQGDDEDSIEKKFGRTKLCARGHWRPHEDSKLKELVTQYGPQNWNLIAEKLQGRSGKSCRLRWFNQLDPRINKRAFSEEEEERLLAAHRMYGNKWAMIARLFPGRTDNAVKNHWHVIMARRHREQNTVYRRRKPSSSCSPKGFDGMIVINGYNNHLNNACSESTISSANIDESGSTCTDLSLTPSSTIVPPGFGFVSRIVSPVLQHHQPYGLQMAGERKVLTVGNVGLDQFCSGGNVVYHGGPMTNVVVDVYQPGNSDSNSEVSASESVANNNNNQANNNPYRENESGGNEEKNRMAFIDFLGVGAT	393	Nuclear
maker-HiC_scaffold_6-snap-gene-784.6-mRNA-1	CoMYB48	MGRAPCCDKANVKRGPWSPEEDTKLKEFMDKYGTGGNWIALPQKAGLKRCGKSCRLRWLNYLRPNIKHGEFSDEEDRIICTLFANIGSRWSIIASHLPGRTDNDIKNYWNTKLKRKLMGLLLPSNHHHHRKPPPYPPPPPLQPPHSQLPSLSPPPPPLPLYNYNPIITGLHDQPNLMNNNNSNNNYYNSSLLQIQSQESLFSPMQYYSVFGGDQASCSSSDGSCSQISIKQEDMVLQSYMSSSNGQLEEDQKFMASTDDYGNHGGDNDIFSTWTDQKPNGYFGNSSSSIPPLEYDLEEVKQLISNGNGISCHDWLFRSL	319	Nuclear
maker-HiC_scaffold_6-snap-gene-880.29-mRNA-1	CoMYB49	MVRAPCCEKMGLKKGPWTPEEDLILINFINLHGHPNWRSLPKQAGLLRCGKSCRLRWTNYLRPDIKRGNFTKEEEHAIIELHEKLGNRWSAIAARLPGRTDNEIKNVWHTHLKKRLNQNKTTPVTKQPQSTTNIQIYDQITQKESEPMNYYPNQVRLQSPQHSSSDISSVTTTTWMKGDELDNFFEVDDNFWSEVFSADNSGTMNDFPATTADPQVQFQFSPIDGVEHAHGYNSSMDYYWYNLLTTAGELPNLTEF	256	Nuclear
maker-HiC_scaffold_6-snap-gene-1082.22-mRNA-1	CoMYB50	MRQPSSSSSAAAAAKGRGKGTGTSKTPCCSKVGMKRGPWTPEEDELLSNYINKEGEGRWRTLPKRAGLLRCGKSCRLRWMNYLRPSVKRGLIAPDEEDLILRLHRLLGNRWSLIAGRIPGRTDNEIKNYWNTHLSKKLISQGIDPRTHKPLSPNSSSAAADDKPSSSKANQIQIQMPPNANPNLVTPPPPALEQPVSSSRRVLINKGRNGYSEGANLGQYYHGEEEEEGVGNGGVLDIQNNSDICGIGLGGSNGLGSNEDDDYEIDYGTNDVFSSFLNSLINEDVFNSQQYVQVQQQSNEISIAPAAAGSSDPLIYPPPQSLAFVAGWDAPIMSAFNQNDPRRFRDHTEKQF	352	Nuclear
maker-HiC_scaffold_7-snap-gene-46.3-mRNA-1	CoMYB51	MDKRPCDSGGDAEVRKGPWTMEEDMILINYIATHGEGVWNTLARSAGLKRTGKSCRLRWLNYLRPDVRRGNITPEEQVLIMELHAMWGNRWSKIAKHLPGRTDNEIKNYWRTRIQKHMNKQGDHQTLSGGQSSEADHNMEQATTSQAMPGPHDADHQHRDADDQTYSPPSYPENLDTFSAPFPTESSNDNVWSMDDLWSLQLLNGDGD	208	Nuclear
maker-HiC_scaffold_7-snap-gene-53.4-mRNA-1	CoMYB52	MDKRPCDSGGDAEVRKGPWTMEEDMILINYIATHGEGVWNTLARSAGLKRTGKSCRLRWLNYLRPDVRRGNITPEEQVLIMELHAMWGNRWSKIAKHLPGRTDNEIKNYWRTRIQKHMNKQGDHQTLSGGQSSEADHNMDQASTSQAMPGPHDADHQHRDADDQTYSPPSYPENLDTFSAPFPTESSNDNVWSMDDLWSLQLLNGDGD	208	Nuclear
maker-HiC_scaffold_7-snap-gene-124.2-mRNA-1	CoMYB53	MVGLMMGWGLPAEQGWRKGPWTPDEDKLLSEYVSLHGEEGGALWLDLQVNQLAVLLRLNRSGKSCRLRWVNYLKPGLKRSKITPQEEGIIIELHALWGNKWSTIARYLPGRTDNEIKNYWRTHFKKRGKPSQKQEKRKTRLLLDQQIKKQEQQEEEQGENDNDVNNKVLSQAEAIDQKMTDEKKGKQETLLFMYPTMENLCFPMMYQDIASWSHTMDDLWSGGLWNLDEPHGRVDQANDYNKINWN	246	Nuclear
maker-HiC_scaffold_7-snap-gene-171.44-mRNA-1	CoMYB54	MRKPCCDKKETHKGAWTKQEDQKLIHYIHTHGEGSWRTLPMAAGLHRCGKSCRLRWINYLRPDIKRGNFAQDEEDLIIKLHALLGNRWSLIAGRLPGRTDNEVKNYWNSHIKRKLIRIGIDPNNHRLNQTLPRPQNQSMSNLTTSSESTNDASKPLKAFTDNDRVSVNASCLEDDNSSSNELNLNLDLTIAIPCAFSLFEGKKGQEKELKVAKESESDQLPTLLLFR	227	Nuclear
maker-HiC_scaffold_7-snap-gene-176.32-mRNA-1	CoMYB55	MDSVCCVPLGVRKGAWTAEEDSLIKKCIEQYGEGMWHQIPSRAGLNRCRKSCRLRWLNYLRPNIKRGNFTMDEVDLIIKLHKLLGNRQVRLLWALIAGRLPGRTSNDVKNYWNTNLQKKLITQKEKMKAKTQEEITKIIRPRPRIFSKTQSRLMDKTAIIENIRTRDNLSEPFPLLLPLPPSRDDGISWDNIVANSKINNGITWPANGLIEEGNIGNWDEKIRPGIHTSCGNFIDEDQSDWSDIFFNNVNLWDLLGDE	258	Nuclear
maker-HiC_scaffold_7-snap-gene-946.32-mRNA-2	CoMYB56	MEFDTKYREDLTYQPILSNNYLKPEIEDGFCFESCSSKGLFFQELHHLHDQFCPNGSSVILELGVQTGCFDPFDPFTNGYSPNLDDFYESKPFAENGANGTNVAVLQNFQGECDGGGGNLNYPKQTPINVTASDQSCGPFNSQDIRPVNFVIPDEGSCIVAENGYYKEVGKKKNSSASSAPKTRKPCKRRNKPSSVKGQWTAEEDRLLIQMVEKYGVRKWSHIAQTLKGRIGKQCRERWHNHLRPDIKKDIWTEEEDRILIQAHLEVRNRWAEIAKRLPGRTENSIKNHWNATKRKQYSKRRCRRLPKYPRQSSLLQDYIKSLNLDGKSEYNSTNMANSFNGVLNVNHPTTIKAPLIQPETVEYFCCPSDHIVPSYDFDVEVPELDFDEKLFEESSSID…	451	Nuclear
maker-HiC_scaffold_7-snap-gene-950.21-mRNA-2	CoMYB57	MEFDTKYREDLTYQPILSNNYLKPEIEDGFCFESCSSKGLFFQELHHLHDQFCPNGSSVILELGVQTGCFDPFDPFTNGYSPNLDDFYESKPFAENGANGTNVAVMQNFQGECDGGGGNLNYPKQTPINVTASDQSCGPFNSQDIRPVNFVIPDEGSCIVAENGYYKEVGKKKNSSASSAPKTRKPCKRRNKPSSVKGQWTAEEDRLLIQMVEKYGVRKWSHIAQTLKGRIGKQCRERWHNHLRPDIKKDIWTEEEDRILIQAHLEVRNRWAEIAKRLPGRTENSIKNHWNATKRKQYSKRRCRRLPKYPRQSSLLQDYIKSLNLDGKSENNSTNMANLFNGVLNVNHPTTIKAPLIQPETVEYFCCPSDHIVPSYDFDVEVPELDFDEKLFEESSSID…	451	Nuclear
maker-HiC_scaffold_7-snap-gene-956.15-mRNA-1	CoMYB58	MEREKGYKKFWTVEEDRILMDYIRVHGEGRWNRLAEMTGLKRCGKSCRLRWNNYLSPRIKHGDFSEEEDDLIIRLHNLLGNRFSSLSTSIDIGQWRWSGMVGGAEMMRCEGREMWSLIAGRVPGRTDNQVKNHWNTHLSKKLGVKKEITKLGASSRTISTKLIESDSVPMTASSNLPSDSNIRAEERNVDDDGYQSNVGFLEVEDQQRINESCESPFWFPDDDLRLSTPSLMEILDEYSFDFVWHNL	247	Nuclear
maker-HiC_scaffold_7-snap-gene-991.4-mRNA-1	CoMYB59	MVRPPCCDKLDVRRGHWTEEEDAKILAYVSKHGTGNWTDVPKKAGLRRCGKSCRLRWTNYLRPDLRHETFTPQEEELIIRLHAAIGSRWSIIAQQLPGRTDNDVKNYWNTKLRKKLSEMGIDPVTHKPFSQILADYGNIDGLPKFGNRIGSLNRDIKNAFISKSVQSPIPQHVFSNFNMHFTTLDHPIQNTTGNYANNSSLDLLAQLQAITLVTEASSNYTNRQATNTPHVDCSSSSAVTQFNASLSFSWRDFLIEDPFIPGDVQQQEEIKQEEKQDFSAVEEMGHEFEVMNSFESSSCSDRSFVEAMMDQQSDMLLEFPGLMEESLFY	329	Nuclear
maker-HiC_scaffold_7-snap-gene-1011.20-mRNA-1	CoMYB60	MGRPPCCDKTGVKKGPWTPEEDIFLVSYIQENGPGNWRAVPTNTGLLRCSKSCRLRWTNYLRPGIKRGNFTDHEEKMIIHLQALLGNRWAAIASYLPQRTDNDIKNYWNTHLKKKLNKLHGHEHGHSQDGFSASQSSSVSKGQWERRLQTDIHMAKKALCDALSIDKSTNLNDLKPSLNGYSHPRSTSPPAAQSSSTMYASSTENIARLLQNWMKGSPKSSQTSSETTTQNSNNNPSEGTLSATTPEGFDSLFSFRSSNSDASQSVTVDETATNFTHETCPFQDESKPSLENQVPLSLLEKWLFDDGAAAQGHGDLLDMSLEENDEFF	328	Nuclear
snap_masked-HiC_scaffold_7-processed-gene-1096.26-mRNA-1	CoMYB61	MSSVSKSASSSSDEDVELRRGPWTLEEDTLLIHYIACHGEGRWNLLAKHSGLKRTGKSCRLRWLNYLKPDVKRGNLTPEEQLLILELHSKWGNRWSKIAQHLPGRTDNEIKNYWRTRVQKQARHLKIDPNSAAFQEVIRCFWMPRLIQKIRGSSSPSSVILSQNLAVASRPLINHSSLPPQVSPQANVYTSETTNNLDHHVKNSSSEHSTSPSVSSSESMNISHMTQVSEYPIEAMGNSHDYNTFLKGGCYNVDNISYDMETFNISSMEFENSIGSCHVSQSNWIDNEFGDSLWNMDELWQFKQLQERGT	311	Nuclear
maker-HiC_scaffold_8-snap-gene-432.15-mRNA-1	CoMYB62	MEGVGELGYGYLQNKPPLYRPSPPLTAIERFLLGNNNHFSLQPTQNIVKNNEPHIPSSGFHGFSPLGGAIGSFSGRFSWSCVPETSFTDRLRETVNRTQDINLNVGLNEENISMPRNSKRVVKTVKDSSFTPQIKGKWTDEEDRKLLKLVRQHGVRKWGQIAEKMLGRAGKQCRERWHSHLRPGIKKDCWSEAEEIMLVKAHKEIGNKWSEIGKQIPGRTENSIKNHWNATKRKLNSKGKIKKSEAQIRSDLTRSTILKNYIKSLNLSDAGTDIAPPITGSTTTPTGSTVTEEDFSNQFSLSLPPDLSEESIDNSPQIMYQSYDDELNFMTNFFGNKDDQLPPPPPPPSIDNNNKDKGVIEAPTVENDHANNVLGHSGLSGVNSFGFNGNNGDHQFLND…	512	Nuclear
maker-HiC_scaffold_8-snap-gene-617.21-mRNA-1	CoMYB63	MGRAPCCDKANVKKGPWSPEEDSKLKEFIEKYGTGGNWIALPQKAGLKRCGKSCRLRWLNYLRPNIKHGEFSEEEDRIICTLFASIGSSCECIGISSETDKLFFFLCMEVIPIKCRWSIIAAQLPGRTDNDIKNYWNTKLKKKLMGMVMVPPNHRKPPPYPPPPPPHSQFPPPPPPPPLYRDCTSYYNNNNPARSFTALEPTSIPPPNLINNNYNPSLSANYCLLQTQESLLSPMQYYPPLKESFQLVFVGDQASCSSSDGSCSQISHGKEIKQEDMGFQSYMSNGFEENHKFMLDYGNNNNTNNGGDQNLISSTCTWIDEKPNVNGYFGNTPLEYDLEEVKKLISTDNECNNNNNNSFFFNDENKTQERTMDYYY	376	Nuclear
maker-HiC_scaffold_8-snap-gene-1085.20-mRNA-2	CoMYB64	EISNMTSDSEDKMSEDCMDSASVEEASSIGKLGGGGLLKKGPWTSAEDAILVDYVIKHGEGNWNTVQKHSGLSRCGKSCRLRWANHLRPDLRKGAFTPKEERQIIELHAKMGNKWARMAAENYWNTRIKRRHRAGLPIYPPDISQALHENQQCQNVGTFPMVETHHPDLLSTNSFEIPAVEFKNLELDQQLYSPALPDMPASGLLAQGLGSSHSDSLMFSMLHPPKRFRESRESECLIPCVNSSTADYFPAFDQYPDDGCEKITQLSSSILPGSHALLNGNFSSSEPMPWAMNPELPSLQYSDAQVGSWGTGTPSSPLPSLDSVSTLIRSPSTEQAQSDSLSRRNSGLLEAVLYESHTLKSSKNSSCDLTSNVSVVAGDAMDSLSQNLRETQWEIHSDP…	534	Nuclear
augustus_masked-HiC_scaffold_8-processed-gene-1091.18-mRNA-1	CoMYB65	MDNLSTTTESSIRVSWSPEEDELLQKLVHRHGARNWSIISRSVPGRSAKSCRLRWCNQLSPEVEHRPFTDEEDKIIVRSQEKYGNKWATIARLLNSRTDNAIKNHWNSTLKRKCYDYRGRSSEESVVERRKRVNATMNIRFSDESRLRSDVDPKDVPSTELSLSPPGICSNELRITHQNRTNTHQNRTSYHEITEFDSFQLLLKEMVREKVKEEVRNYMLQLEKNGECFAE	231	Nuclear
maker-HiC_scaffold_9-snap-gene-69.3-mRNA-1	CoMYB66	MASKRTESMKKEINRGAWTAEEDQKLAEVIESHGAKRWKTIAIKAGLNRCGKSCRLRWMNYLRPNIKRGNITDQEEDLIFRLHKLLGNRWSLIAGRLPGRTDNEIKNYWNSHLSKKINQMEKQNEGSRGELGSKTKRRRVVEKANEEVKGEETSNGGEDSKINFDHDDFFDFSNESPFTLGW	182	Nuclear
maker-HiC_scaffold_9-snap-gene-74.16-mRNA-1	CoMYB67	MGRRPCCAKEGLNRGAWTAMEDKILTDYIRVHGEGKWRNLPKRAGLKRCGKSCRLRWLNYLRPDIKRGNISRDEEDLIIRLHKLLGNRWSLIAGRLPGRTDNEIKNYWNTNIGKKVQVLSQPSSTSTISNRNNSSNPQSKQNPSPPIDHSVAQPPLPNTEPSRLVRTKASRCTKVFIRPDHQNVTIHHNVGVGVAASDPVNDISPFISAKDDTLDFMMDFEMDENFLSDFLNTDFPPLHEFHNDLKGDTTDTVTSSSSLDSNQNLLLSNEMLQSSDLQSLAPLLDPCMDWLQDQ	294	Nuclear
maker-HiC_scaffold_9-snap-gene-109.0-mRNA-1	CoMYB68	MAHHTCCNKQKVKRGLWSPEEDEKLINYISTYGHGCWSSVPRLAGLQRCGKSCRLRWINYLRPDLKRGSFSPQEAALIIELHSILGNRWAQIAKHLPGRTDNEVKNFWNSSIKKKLISHQYLATYPNLPPNPNPTGPFDGFFSVNNANPNLIPSPQDHLYIPTQNSVLQGFDHGHEMKVLDQINFDPNLVPLQPPNSIPILLDLPSYDSSSWPLNYQTPHIDHQNVLKEEDCMFINPKMTTIPPSYDDPMAMPIMPKVYDMINCAMPSSSASHKVDPITSLSCFPSGVPNSRDPNVTTNQMEYINVIMSSLPSSSLSSSSSSSSPSSSLSPLPCSQFVMNPNLATSWDP	349	Nuclear
maker-HiC_scaffold_9-snap-gene-718.16-mRNA-1	CoMYB69	MEFDTKYREDLSYQPSLLSNNYLKPEIDKDFYFESSSSNGFFFHDLHHLDQFSFNGLNPEFCVQTICFDPFDPFTSNCSPNLDDFYESKPFAHSGVNNGTNEAANGSGGGGGGGGGGGGYLNYPKKTPGDAAESDRRYEEDIKPVKFVIPPDQGSSCITAENSGASAAPPTRKPFKCRKKSNSVKGQWTIEEDRELIEMVEKYGVRKWSQIAEMMEGGRIGKQCRERWHNHLRPDIKKDTWSEEEDKILIQTHTEVGNKWAEIAKRLPGRTENSVKNHWNATKRRQYSKRKCRTKNPRPSSLLQNYIKSLNLDGKFDIKAKNALATEKLFEESSILLDQMPSPPPVDDEKSFEMELPLDRVHVASFMKREVKKEKDLMEMITQVNL	386	Nuclear
maker-HiC_scaffold_9-snap-gene-879.2-mRNA-1	CoMYB70	MGRPPCCDKVGVKKGPWTPEEDIILVSYIQEHGPGNWRAVPTNTGLLRCSKSCRLRWTNYLRPGIKRGNFTDHEEKTIIHLQALLGNRWAAIASYLPQRTDNDIKNYWNTHLKKKLKKLQDHEGQNQDEFSASQSISKGQWERRLQTDIHMAKQALCEALSLDKTTNLPELKPSSDNYPCTRPSQSTTTYAWSTENIARLLQNWMKSSPKSSQTSSETTTQNSTCNPLGTNSSPSEGTVTEGFDSLFSFHSSNSDVSQSMTVSVNETTTNFTPETSFFQDESKPNLGTQVPLSLLEKWLFEDGAAQGQGGDLLDMSLEGSDELF	324	Nuclear
maker-HiC_scaffold_9-snap-gene-1092.0-mRNA-1	CoMYB71	MSSSLTKSASTSSTDEDTELRKGPWTLEEDTLLIHYISSHGEGRWNLLSKRSGKNQPLLNYCRTSLGQRTGKSCRLRWLNYLKPDIKRGNLTPHEQLLILDLHSKWGNRWSKIAQHLPGRTDNEIKNYWRTRVQKQARHLKIDSNSAAFQEIIQCFWMPRLLRKIQGSPSSVMLSQNSATTQTLINHSSLLPQVSPNKGHVHTSEKTKSPSIDYLESMSDSHIPQILEYPTSDYNTVVKGCYNVDNIGYDMEAFSLASMVVPSDFEDSMGGSQLAENNGVGSAALVDSLWNIVDESWVVL	300	Nuclear
snap_masked-HiC_scaffold_10-processed-gene-372.26-mRNA-1	CoMYB72	MKKEDQTESPVVDAAVDAVADLVVVLEGDGDGNGNGDGGGSSSSRVKGPWSPEEDAVLSRLVSKFGARNWSLIARGIPGRSGKSCRLRWCNQLDPCVKRKPFTDEEDRIILAAHAVHGNKWASIAKLLPGRTDNAIKNHWNSTLRRKGTELKRFKPSSVNILEEGSPDCTKASSEETLSYGENNSLRALEGKDLSLTQNRLNHCEEHRATEINRPALSRPVPRVGAFSVYNSPSSSRTGSIFSRIDPMQGPLIQAVKPDFGVCKFLEGVGVEPVVPLQCGHGCCEASSGASSRRSLLGPEFVDYDEPPPFSSHELATIATDLNNIAWIRSGLDSTGTQVVENAASQRASQGVAAQMGVFEQNLNHDNFRFEEGRNRLMGTMTDVMSSQMPMPTFALPAE…	404	Nuclear
augustus_masked-HiC_scaffold_10-processed-gene-442.21-mRNA-1	CoMYB73	MKEMNNHMAESGRGGGDKIRGSWSPEEDATLMRLVEQHGPCNWAVISTGIPGRSGKSCRLRWINQLSPAVQHRPFTPAEDAVILKAHSVYGNRWATIARQLPGRTDNAIKNHWNSTLRRRSKEAEADAEESVSVVETEEESDESGAKRMRFRTVVECNAAAAAAEERRRDLPKTSLTLSPPGKSQAARDEVVKKNEEARIMRDDDDDDEREERSTVLNHRALRNMIRRMIAEEVRRYIDSDIV	243	Nuclear
maker-HiC_scaffold_10-snap-gene-678.2-mRNA-1	CoMYB74	QLMGRKPCCDKFVVKKGPWTAEEDAKLVSFILTNGHCCWRAVPKLAGLRRCGKSCRLRWTNYLRPDLKRGLLNEEEEKLVIDLHARLGNRWSKIASRLPGRTDNEIKNHWNTHIKKKLIKMGIDPITHEPLHQEPDPIIISQQMPHSPSNNNNNNCLNSDNFNYSTGQKESPKNANNQTTSNDNLTFLQKNLTGYETQKDDDDDPLMSCIQSETFLDDAFWNFATTSGGDQDYTEFGLSSSSSSSSSEDCNSTWLLDYNDFDFDLECFNIDMSTFEVDATIN	282	Nuclear
snap_masked-HiC_scaffold_10-processed-gene-1123.48-mRNA-1	CoMYB75	MNSKRKTLEGQKTFKGSMMGRSPSSSDENGLKKGPWTPEEDRKLIDYIERNGHGSWRALPKLAGLNRCGKSCRLRWTNYLRPDIKRGKFSDEEEQIIINLHAVLGNKWSAIATHLPGRTDNEIKNFWNTHLKKKLLQMGIDPVTHRPRTDLSLLANLPQLLSAAASHFVNPMNNNPWDNNSLSLRLHTDATQQLAKLQLLHNIVHVLSTSPVTPTMEALNHLGTLPLHDQHDHLHEYLRMNSQFELEGLGNSTINLASNPNQIPYSSTFPSLIDVNQPTHNVHQPIGNSKVFNGDDSDGNDQFGAIPKENSLPPLVSVLDSTDQCFTVNRMENKMNPSDHISNPSTSTSTTFGGAWGELLDDDDAGDSFLLDLQRL	376	Nuclear
snap_masked-HiC_scaffold_10-processed-gene-1143.20-mRNA-1	CoMYB76	MFWGVGSMMGRSPSSSEENGLKKGPWTPEEDRKLIDYIERNGHGSWRALPKLAGLNRCGKSCRLRWTNYLRPDIKRGKFSDEEEQIIINLHAVLGNKWSAIATHLPGRTDNEIKNFWNTHLKKKLLQMGIDPVTHRPRTDLSLLANLPQLLSAAASHFVNPMNNNPWDNNSLSLRLHTDATQQLAKLQLLHNIVHVLSTSPVTPTMEALNHLGTLPLHDQHDHLHEYLRMNSQFELEGLGISTINLASNPNQIPYSSTFPSLIDVNQPTHNVHQPIGNSKVFNGDDSDGNDQFGAIPKENSLPPLVSVLDSTDQCFTVNRMENKMNPSDHISNPSTSTSTTFGGAWGELLDDDDAGDSFLLDLQRL	366	Nuclear
maker-HiC_scaffold_10-snap-gene-1250.0-mRNA-1	CoMYB77	MGRQPCCDKVGLKKGPWTAEEDKKLINFILSNGQCCWRAVPKLSGLLRCGKSCRLRWTNYLRPDLKRGLLSDYEEKMVIDLHAQLGNRWSKIASHLPGRTDNEIKNHWNTHIKKKLRKMGIDPLTHKPLPTPPTDRDQPQQEQPQEDQQPPLPSLTCKISEVAVGQNSEIETSFESSITEEAKHKEKEEDINIEGPFDSLMDVNNGFCTDDIPLIEPHEINLLPPCTTAPSISSTTTTSSSSTSSSSSASSSSSSYSSSNNNILEDLDLLPNFDSWQSDLSNSLVFWDDDDFISTFDLWINGGDSDRNLSSTVDDHPPPTQ	321	Nuclear
maker-HiC_scaffold_10-snap-gene-1376.7-mRNA-1	CoMYB78	MGRSPCCDERGLKKGPWTPEEDHKLVKYIHKHGHGSWRALPKLAGLNRCGKSCRLRWTNYLRPDIKRGKFSQEEEQTILNLHSILGNKWSAIATHLPGRTDNEIKNFWNTHLKKKLIQMGFDPMTHRPRTDIFSSLPHLIALANLKELVEHHTWEEQAARLQTEAVQMASLQYLQYLLQPQPSMSTFSNNSNSTVTDMETYNLLNSLSLMKDSSIQFGTPTPSSLGTTTSLQSIQDSFPFSHMPDLQVPSSFQAPMDNKDIVQASDYTVLSHGEHSPTSPWLASPTSPSPPMAAAPTLIANMGDACSTSSYEGGHSSFWPEVLLEDPLFHEIA	333	Nuclear
maker-HiC_scaffold_10-snap-gene-1385.38-mRNA-1	CoMYB79	MGRSPCCDERGLKKGPWTPEEDHKLVKYIHKHGHGSWRALPKLAGLNRCGKSCRLRWTNYLRPDIKRGKFSQEEEQTILNLHSILGNKWSAIATHLPGRTDNEIKNFWNTHLKKKLIQMGFDPMTHRPRTDIFSSLPHLIALANLKELVEHHTWEEQAARLQTEAVQMASLQYLQYLLQPQPSMSTFSNNSNSTVTDMETYNLLNSLSLMKDSSIQFGTPTPSSLGTTTSLQSIQDSFPFSHMPDLQVPSSFQAPMDNKDIVQASDYTVLSHGEHSPTSPWLASPTSPSPPMAAAPTLIANMGDACSTSSYEGGHSSFWPEVLLEDPLFHEIA	333	Nuclear
maker-HiC_scaffold_10-snap-gene-1732.9-mRNA-1	CoMYB80	MGRAPCCDKANVKKGPWSPEEDAKLKSYIDEHGTGGNWIALPQKIGLKRCGKSCRLRWLNYLRPNIKHGGFSEEEDNIICSLFLSIGSRWSIIAAQLPGRTDNDIKNYWNTKLKKKLMGKQRKEQQARSSSLQQEMKREISCSEAFMVSSEVINSVPYWPELPVNMLAMNNPSREDYFKDQTSVRKLLVSIGGRFHDDDHHEPNNNSTSFQYPFDNSINTFASTASINSMNSSCSQQPNMFEGFNNNYPIELASSELVYNSPQQLDVLESFSGVDMVNGSGIISSAESTKWGEMISSLVYPPMVASNYEAFQKRVIQDCSFQESSNQWTQKAQQSCCEVL	340	Nuclear
augustus_masked-HiC_scaffold_10-processed-gene-1783.11-mRNA-1	CoMYB81	MASTKKDVDRIKGPWSPEEDDMLQKLVQKHGARNWSLISKSIPGRSGKSCRLRWCNQLSPQVEHRAFTPEEDETIMRAHARFGNKWATIARLLSGRTDNAIKNHWNSTLKRKCSSMSTDEGDDCSNHQPLKRSASAGSAVPVSGLYLSPSSPSGSDVSDSSLPVMSSSHVYRPVARTGGVLPPQVETTSLKNDPTTSLSLSLPGVDSSDSSNRVNEATQLRPPPPAAALASMNIEFASPSMAAAPAIVVPVQPVNQRNSEFGGVSSPAPETAFPQFSAELLGVMQEMIRKEVWNYMAGIEQIPTQQQGGYCMPQAAADGFMNAVVKRIGISKIE	334	Nuclear
augustus_masked-HiC_scaffold_10-processed-gene-1785.20-mRNA-1	CoMYB82	MASTKKDVDRIKGPWSPEEDDMLQKLVQKHGARNWSLISKSIPGRSGKSCRLRWCNQLSPQVEHRAFTPEEDETIMRAHARFGNKWATIARLLSGRTDNAIKNHWNSTLKRKCSSMSTDEGDDCSNHQPLKRSASAGSAVPVSGLYLSPSSPSGSDVSDSSLPVMSSSHVYRPVARTGGVLPPQVETTSLKNDPTTSLSLSLPGVDSSDSSNRVNEATQLRPPPPAAALASMNIEFASPSMAAAPAIVVPVQPVNQRNSEFGGVASPAPETAFPQFSAELLGVMQEMIRKEVWNYMAGIEQIPTQQQGGYCMPQATADGFMNAVVKRIGISKIE	334	Nuclear
maker-HiC_scaffold_10-snap-gene-1975.30-mRNA-1	CoMYB83	MGRTPCCDKVGLKKGPWTPEEDQKLLAYIEEHGHGSWRALPSKAGLQRCGKSCRLRWTNYLRPDIKRGKFSLQEEQTIIQLHALLGNRWSAIATHLPKRTDNEIKNYWNTHLKKRLAKMGIDPVTHKPKNDALLSSDGQSKNAANLSHMAQWESARLEAEARLVRQSKLLSNSLQHHQLGSPAPEFSPASTPVIKSAAEPTSPPRCLDILKAWNSVWTTPTDGGLGGDSESPTSTLSFSENAPPISGGGIGESSAAAFIEFVGNSGGMLKEEGDEDWNGVENSTHLPELIKDGIENSISFMERFVESGVGEEW	313	Nuclear
maker-HiC_scaffold_10-snap-gene-1978.2-mRNA-1	CoMYB84	MALYPNMGSLSLNHPTTSSASQLLHYYKKSHDQSKFDMPSSFKEICTTTTNTNSEGSDDNAPMEDDDEINDDDPNNGSVKEKEMEGGKQQSNKLCGRGHWKPAEDSQLKQLVALYGPQNWNLIADKLEGRSGKSCRLRWFNQLDPRINRRAFSEEEEERLMAAHRVYGNKWAMIARLFPGRTDNAVKNHWHVIMARKYRQQSIAYRRRKLSHSVVGSEPNTFSFCGGNFISSNHFPFDVPIGGFNVLHSMSNGKGAVLSSGRDLLLDPCGQTPFDFFTDLKRVNDMNSCIGSQKKFWDPIVPRDDYDHHPSPLLAMQHSSLSCNNQLSFLSDTMVSTSQVSVTELSSSSPSSLAADNTANTATSHFETTVSPPFIDFLGVGAT	383	Nuclear
maker-HiC_scaffold_10-snap-gene-1988.31-mRNA-1	CoMYB85	MGRSPCCDKVGVKKGPWTPEEDIMLVSYVQEHGPGNWRVVPTNTGLRRCSKSCRLRWANYLRPGIKRGSFTDHEEKIIIQLQALLGNKWAAIASYLPERTDNDIKNYWNTHLKKKLKKLQEQEAFDDHHSKVGFSTSHSISRGQWEKKLQTDINKAKQALHEALSLEKPSLIVPELKPSNGYYSYTKPTTQGPTYASSTENIARLLKGWMKNSPKQAHANSSSTQNSMSCEETLSVPNNSGIDLSEAFESLFGFDSLDSSNSDFSQSMSPEASLVQGESKPDLGMHVPLSMLENWLFDEGVVQGIKEDLTDFSFDENAELF	321	Nuclear
maker-HiC_scaffold_10-snap-gene-2020.38-mRNA-1	CoMYB86	MGRPPCCDKSNVKRGLWTAEEDAKILAYVANHGIGNWTLVPHKAGLNRCGKSCRLRWTNYLRPDLKHDNFTPEEEQLILDYHKVIGSRWSLIAQQLPGRTDNDVKNYWNTKLKKKLFKMGIDPLTHKPFSQILSDYEKIASLPVLNISTNNMSSLVPIEPSCITTINQPLPQQFISQETVQQHEVPSLTSSSSSSYSVTQLSSPRSFSCLSTPVPVAPSSPSSWCSEFLLGDPILSSDMDPKQEHNLHVPLITLQSNKPHYQFSEVAQERGCEAMYIGGQTERYCSEAASTSSANSFVEAILDRDSEIQSEFPEVLNEYFSF	322	Nuclear
maker-HiC_scaffold_10-snap-gene-2037.31-mRNA-1	CoMYB87	MGRPPCCDKSNVKRGLWTAEEDAKILAYVANHGIGNWTLVPHKAGLNRCGKSCRLRWTNYLRPDLKHDNFTPEEEQLILDYHKVIGSRWSLIAQQLPGRTDNDVKNYWNTKLKKKLFKMGIDPLTHKPFSQILSDYEKIASLPVLNISTNNMSSLVPIELSCITTINQPLPQQFISQETVQQHEVPSLTSSSSSSYSVTQLSSPRSFSCLSSPVPVAPSSPSSWCSEFLLGDPILSSDMDPKQEHNLHVPLITLQSNKPHYQFSEVAQERGCEAMYIGGQTERYCSEAASTSSANSFVEAILDRDSEIQSEFPEVLNEYFSF	322	Nuclear
maker-HiC_scaffold_10-snap-gene-2072.64-mRNA-1	CoMYB88	MDKKSGNSQDAEVRKGPWTMEEDLILINYIANHGEGVWNSLARSAGNFSLSLPLSLCVMETLTLVFKTVLLGLKRTGKSCRLRWLNYLRPDVRRGNITPEEQLLIMELHAKWGNRWSKIAKHLPGRTDNEIKNYWRTRIQKHIKQAETFSAGAQSSDNNDQISGSADHHYHHHPLETYSSSLSYPENDHGSTSQMFGSTDHHLLLHHQAVESYSPVLSYPGNLETFPATFPTESTDNIWSMEDLWSMQLVNGD	253	Nuclear
genemark-HiC_scaffold_10-processed-gene-2075.18-mRNA-1	CoMYB89	MENGLLIGSSSPNGLYQNFPNFDKFPIQGSSSSNLSWGVLAPFYDPFVPFQTSSINGCSNNRFHLNASIPSGSNGANHVMHGGQNVGFLNYPPRILLEALNQDETFQPKNYQTFGSTNVNLSDEVSCLTKEGGNQKKVESKRRRMQQWAPEEDRLLVQLVKEYGEKKWSHIAQMLNGRMGKQCRERWHNHLRPDIKKDIWSEEEEMKLIEVHRQIGNKWAAIAREMPGRTENTIKNHWNAAKRRRFSKCKGQYNCLLQDYIKSLPSDSTVTDGQESPSSDSNLRIVDNTDLEEDNKDQKDPTFDSDKAVDYQIYEKMAVEVDDFGSMLNESNKTELEIEMEMMPAELMDKEMSFDVNNKDMDLLEMLCQGIF	372	Nuclear
genemark-HiC_scaffold_10-processed-gene-2077.75-mRNA-1	CoMYB90	MEFDTNFNENPTFYQSFSPEKNSKPQMENGLLMGSSSPNGLYQNFPNFDKFPIQGSSSSNLSLGVLAPFYDRFDPFLPSSINGCSNNRFHLNASIPSGSNGANHVMHGGQNVGFLNYPPRILLEALNQDETFQPKNYQTFGSTNVNLSDEVSCLTKEGGNRKKVESKRRRMQQWAPEEDRLLVQLVKEYGDKKWSHIAQMLNGRMGKQCRERWHNHLRPDIKKDIWSEEEEMKLIEVHRQLGNKWAAIAREMPGRTENTIKNHWNATKRRRISKRKCQYSSLLQDYIKSLPSDSTVTDGQESLSSDFNLRIIDNTDLEEDKKDKNDLTSDSDKAVDYQIYEKMAVEEDDFGSMHNESYKVKLEMEMEVEMMPAELMDKEMSFDVNNKDMDFLEMLCQGIF	400	Nuclear
genemark-HiC_scaffold_10-processed-gene-2080.18-mRNA-1	CoMYB91	MENGLLMGSSSPYGLYQNFPNFDKFPIQGSSSSNLSLGVLAPFYDRFDPFQPSSINGCSNNRFHLNASIPSGSNGANHVMHDGQNVGFLNYPPRILLEALNQDQTFQPKNYQTFGSTNVNLSDEVSCLTKEGGNRKKVESKRRRMQQWSPEEDRLLVQLVKEYGEKKWSHIAQMLNGRMGKQCRERWHNHLRPDIKKDIWSEEEEMKLIGVHRQLGNKWAAIAREMPGRTENTIKNHWNATKRWRFSKRKEDNKDQKNPTSDSDKAVDYQIYEKMAVEEDDFGSMLNESNKAELEMEMEMKMMPAELMDKEISFDVNNKGMDLLEMLYQGIF	332	Nuclear
maker-HiC_scaffold_11-snap-gene-183.12-mRNA-1	CoMYB92	MGYKAVDQKQKQKHRKGLWSPDEDQRLRTYILNNGHGCWSSVPINAGLERNGKSCRLRWINYLRPGLKRGMFTAHEEETILTLHGMLGNKWSQIAQHLSGRTDNEIKNYWHSYLKKKKMAKIEQTKPNTEPEYTNPNTGNTQSSLSSLKSTTRNLSFESFDNMEGTSMETNESISQLPKLLFAEWLSLDQFQGQDLTNSGRPAVSKDDPNLQYSFLNCLLMNEGAFGGKFHQELSNGSGTADEMSNPQFNSEEEDQFVNFITEGDMCSHFNMDSDVFMLEKRAGVWVGGESKELHEAEYQEEEERR	306	Nuclear
maker-HiC_scaffold_11-snap-gene-199.32-mRNA-1	CoMYB93	QRKRKRREEEMGRAPCCDKEAVKRGAWTPEEDKILVDYITTHGHPTWRSLPKLAGLLRCGKSCRLRWTNYLRPDIIRGPFTPEEENRIIQLHGMLGNKWAAIASHLPGRTDNEVKNFWNSNLKKRFFCISGLNLQASKPPSASNSINTKPEPPSTRHMAQWESARVEAEARLSMNSLLSPSQTVKTDCDYFLRLWNSEVGESFRSLNGRRESQSPISQTSSSTKGGSGSGVTMQAGPSRTSSPIEQKCMYANDMMGGSECSNSYELDDSSNSALNLLLDLPSGDDDMGFLQGQPDDVSIFFRH	303	Nuclear
maker-HiC_scaffold_11-snap-gene-972.36-mRNA-1	CoMYB94	MRVPCCEEMGMKKGPWTPEEDQILISYIQSYGHGNWRALPKQAGLLRCGKSCRLRWTNYLRPDIKRGNFTREEEETIIKLHQIIGNRWSTIASRLPGRTDNEIKNFWHTHLKKRLKQSHHMVIQSLTYAPVSTQFSEFISSSESDSPVEKVTGPANEEEHTINANVNDDMAFWHNLFMKAGE	182	Nuclear
maker-HiC_scaffold_11-snap-gene-1222.2-mRNA-1	CoMYB95	MVRTPSFDKNGMKKGAWSPVEDNKLRAYIHRYGHWNWRELPKYAGLSRCGKSCRLRWMNYLRPNVKRGKYTKVEDDLIMELHEKLGNKWSAIAAKLPGRTDNEIKNHWHTHLKKRIKENQSTFELKQKAIQISQSLANLELQSHESPRSEIKQVTDELGSEDVTDEIYQQILESSPLSSQELSSSDFSSSMTSDYALLSDKNWVGEDSMSSLESFEESVRNFWIEPVFEDFSYQQNEFSSNLAAGESMFPCLLDHDDDSIEWFHQILKELPEN	273	Nuclear
maker-HiC_scaffold_11-snap-gene-1223.28-mRNA-1	CoMYB96	MVRTPSFDKNGMKKGAWSPEEDNKLRAYIHRYGHWNWRELPKYAGLPRCGKSCRLRWMNYLRPNVKRGKYTKAEDDLIMELHEKLGNKWSAIAAKLPGRTDNEIKNHWHTHLKKRIKENQSTFELKQKAIQISQSLANLELQSHESPRSEINHVTDEFGSKDVNDEIYQQILESSPLSSQELSSSDFSSSMTPDYALLSDKNWVGEDSMNSSESFEESVRNFWIEPAFEDFSYQQNEFSSNLAEGESMFPCFLDHDDDSIEWFHQILEELPGK	273	Nuclear
maker-HiC_scaffold_11-snap-gene-1227.45-mRNA-1	CoMYB97	MVRTPSFDKNGMKKGAWSPEEDNKLRAYIHRYGHWNWRELPKYAGLSRCGKSCRLRWMNYLRPNVKRGKYTKAEDDLIMELHEKLGNKWSAIAAKLPGRTDNEIKNHWHTHLKKRIKENQSTFELKQKAIQISQSLANLELQSHESPRSEINHVTDEFGSKDVNDEIYQQILESSPLSSQELSSSDFSSSMTPDYALLSDKNWVGEDSMSSSESFEESVRNFWIEPAFEDFSYQQNEFSSNLAEGESMFPCFLDHGDDSIEWFHQILEELPGK	273	Nuclear
maker-HiC_scaffold_11-snap-gene-1231.5-mRNA-1	CoMYB98	MVRTPSFDKNGMKKGAWSPEEDNKLRAYIHRYGHWNWRELPKYAGLSRCGKSCRLRWMNYLRPNVKRGKYTKAEDDLIMELHEKLGNKWSAIAAKLPGRTDNEIKNHWHTHLKKRIKENQSTFELKQKAIQISQSLANLELQSHESPRSEINQVTDELGSKDVTDEIYQQILESSPLSSRELSSSDFSSGMTSDYALLSDKNWVGEDSMSSSESFEESVRNFWIEPVFEDFSFQQNEFSSNLAEGESMFPCFLDHDDDSIEWFHQILNELPEK	273	Nuclear
maker-HiC_scaffold_11-snap-gene-1234.2-mRNA-1	CoMYB99	MGRSPCCEKSGVKKGPWTPEEDQKLIQYIQIHGPANWRNLPKNADSYFFGSNFIIQLHVGLRRCGKSCRLRWTNYLRPDIKRGRFSFEEEETIIQLHRIMGNKCLLKSGNKPDESNFVNLDENYAFQNQSTFKIMQLNSLFDFRWSAIAARLPGRTDNEIKNYWNTHIRKRLLRMGIDPVTHSPRFDLLDLSSILSSTQLNLSNFLGLQTLMNPELLRLASTLLSSHNENPEMLLQKHQENQLFNTHLQNQTPIQEFPPCSSSSVPCTSFIDQTQLIQGIEMGQFSTNLTDLSCQNSQENMNLPYYGGYNNVSDLSDNSTFQSMNNSSNTSQNFTFDSVMSTPISSPTPLNSSSTFINSSSTEDERESYCSNMLKFEIPEGLDFNDFMFVFGVDIAEMFC	400	Nuclear
maker-HiC_scaffold_11-snap-gene-1777.28-mRNA-1	CoMYB100	MGRGRAPCCDKSKVKTGPWSPAEDLRLISFIHKHGYSNWRSLPIQAGLSRCGKSCRLRWINYLRPDVKRGNFTNEEEETIIKLHQTLGNKWSKIASYLPGRTDNEIKNVWNTHLKKRLAKKEEKNHKNQTNDFSRTSSFSTSSTSSFMSSYGNNEDTEELVLDEGQEGLANKSYEPKEDIPTTDHDHELKESSSSSNSSISCDASDCSNSSAQVDVSIPEPEPEPEEEEEEEEEEEEGSLFNFGGPCEADNATIAYDQVNNNSDDHQVIEIPLEDSDVDFWDMLDNLDDPFQSINESPQLPQELEASQSSNYDHHTEIEYCREWLRDLENELGLVEATSDGVGQLGSEIDHAKRYFQTWPSPPQNLGV	368	Nuclear
maker-HiC_scaffold_12-snap-gene-173.3-mRNA-1	CoMYB101	MGMVFTATSVSSSQESSFCKSSTEMEYGRASWGFQQTHNNSSDDCSDGFGENNETIDLNESLNEEEMIKDGINGESVGKERENGGQSKLCGRGHWRPAEDTKLKELVAVYGPQNWNVIAEKLEGRSGKSCRLRWFNQLDPRINRKAFNEEEEERLMSAHRLYGNKWAMIARLMPGRTDNAVKNHWHVIMARKYKEQSSAYRRRKIAQSVHTRLEGEDPSIVYRVTEPPSQPYCVNLCSSNVSLPHNGFCALQTPDFHSGPNSHEMVDIFNQNRAWERSVDDKELKVAYFYPHHQPPLMMTAMQQSLYHHYSSSSHCSVTEPLSSPLTDEEYRRETNHLQTVVEPTFIDFLGVGTT	355	Nuclear
maker-HiC_scaffold_12-snap-gene-179.51-mRNA-1	CoMYB102	MGRSPCCEKVGLKKGPWTPEEDQKLLAYIEEHGHGSWRALPAKAGLQRCGKSCRLRWTNYLRPDIKRGKFSLQEEQTIIQLHALLGNRWSAIATYLPKRTDNEIKNYWNTHLKKRLTKMGIDPVTHKPKSEALGPGQLKDAANLSHMAQWESARLEAEARLVRESKLHVINPFHSSSAAVPPHHHHLGPPPPPPPLCLDVLTAWKGSWLKTPKDNAIAGNIFAALESPTSTLNFRENPFPIINGGLFGNNSVAVIDQLVNKSNNFTEMKERIDSAAMEFHDMVGYSNDDVYIAETLKNANNANLLIPNFMDGLTDLLLENSNEIVNSENVGGSCYSVDFEENKNYWNSILSVVIVRRLVRQCFKF	365	Mitochondrial
maker-HiC_scaffold_12-snap-gene-396.17-mRNA-1	CoMYB103	MRKPCCEKQDTNKGAWSKQEDQKLIEYIRRNGTGCWRTLPQAAGLLRCGKSCRLRWNNYLRPDLKRGNFAEDEEDLIIKLHALLGNRWSLIAGRLPGRTDNEVKNYWNSHLRRKLINMGIDPTKHRLSQTLTHPQIIGAIGSATSSASRDHACQPLKTKGDHDQVSDAASCLEDATWGLPDLNLDLRLTAPQSIAIVEEESKQNESTMSRKVESTPPRTLVLFR	224	Nuclear
maker-HiC_scaffold_12-snap-gene-482.29-mRNA-1	CoMYB104	MGRAPCCDKTKVKRGTWSPEEDITLKNYIEKFGTVSNWISLPQKAGLMRCGKSCRLRWLNYLRPNIKHGGFTEEEDNIILFLYHNMGSRQFSLVIFELRCLVKLFFLLVIRWSVIASHLPGRTDNDVKNYWNTKLKKKLLLKNTTFKSTTNTKLNTYCHGNSDCSNTSTSGVLQHAMINANYQQNLVPEVVLSDPIQVQESGSPSTNICSSGGVSTSSQEVTSLSPFENKDGLWPGNGGGGAAQDDDGFLMGLVGSGFYYDLLNDFDFEEKIG	273	Nuclear
maker-HiC_scaffold_12-snap-gene-631.18-mRNA-1	CoMYB105	MEMKEGKSSIKKGLWKPEEDIILKNYVEAHGEGNWANVSEKSGLMRGGKSCRMRWKNYLRPNIKRGRMSDDEKDLIIRLHKLLGNRWTLIAGRLPGRTDNEVKNYWNTHLNKRSSQTKTTTICSKKKKKLQQFPTSQPTRCKISENDDERLQGRKGEGITAVSPWIEHARSFNFDTEPPLFPANDAPLFTDDEPFMPILDSLALYEALQSNGEYPQEVAGHAIGLC	226	Nuclear
maker-HiC_scaffold_12-snap-gene-812.40-mRNA-1	CoMYB106	MSHMTNESDDEMLSKDHTGSPLTDEGNCGGSMNGGVVLKKGPWTSAEDAILVDYVRKHGEGNWNAVQKHSGLFRCGKSCRLRWANHLRPNLKKGAFTPDEEKTIIELHAKMGNKWARMAAHLPGRTDNEIKNYWNTRIKRRQRAGLPLYPPEVCLQAFQENQQNQNASGDKGQHDLMQTDICEIPDVIFDSLKANHGVLPYVPELPDISTSSMLMKGLGSSQCYGSVPPMVHRQKRLRESPTSFSGHDGIVRNEPSPFDQTPDDNCDNMTSQFFGLSFPYDPDPITKNLLSFSGNQSSHFLINGNFSASKPTNGAVKLELPSLQYPETDFSSWGSSSPPALLESVDAFIQSPPSGTLQSDCLSPRNSGLLDALLHEAKTLSTKNQLSDKSSNSSTITPG…	557	Nuclear
maker-HiC_scaffold_12-snap-gene-963.18-mRNA-1	CoMYB107	MGRKPCCDMKGLKKGPWTPEEDDILIDYIKKNGHGSWRSLPNLAGLLRCGKSCRLRWTNYLRPDIKRGPFSPEEEKLVIQLHGILGNRWAAIASQLPGRTDNEIKNLWNTHLKKRLLSMGIDPQTHEPSSTLNIPNRKPPSSPSTRHMAQWESARLEAEARLSKESSLFNPTSFGRTSSDYFLRMWNSEIGESFRNIHKGNKKSACQSPVSLASSSAKCGSVSGTTTEMGVPLIGSYEDIECKGNKLCTDDVIDGSDSSSSNSLEDSSDTALQLLLDFPGNNDMSFLEHDDDNYVFCPAILSENSLNCSL	310	Nuclear
maker-HiC_scaffold_12-snap-gene-1194.8-mRNA-1	CoMYB108	MGRRNRDGEEVSVMGVEEIRKGPWKEEEDEVLIKHVNKYGPRDWSSIRSKGLLNRTGKSCRLRWVNKLRPNLKKYAFSLPYIGVKFSAEEERTVLELQAQFGNKWAKIATYLPGRTDNDVKNFWSSRQKRLARLLQTPPPLSKSENSRRKVAVLHAVPTNTEAPKFSYSSMEEESSSKSRSCCSPLIDNSHTIKMVPLPDLLNPNLLNCEQNLLQLKFNLVDQKNRIDESQPQVPFPIIPELQPDDPLGLGSQELVDPTFLDVFGNVDASDIGDMAQLPLMLPCGGRGENENPATPDSFFNDFPADIFDHMEPLPSPSEW	320	Nuclear
maker-HiC_scaffold_12-snap-gene-1846.18-mRNA-1	CoMYB109	MGRHSCCFKQKLRKGLWSPEEDEKLINHITKYGHGCWSSVPKLAGLQRCGKSCRLRWINYLRPDLKRGTFSQQEENLIIELHAVLGNRWSQIAAQLPGRTDNEIKNLWNSSIKKKLKQKGIDPNTHKPLSNAESEEKASGESKSNELTNVEAENSDKGMAIHKSKRASVATENYFENNCNNNMTTPPSTTHEFFLDRFVSSHESSTAACKTSNFPAYFPFQQLNYGSDARLSVNTNTPNNLFLNPNTTTLFSSMSSPTIKPSISLPSSTPSMSSFDINGVHNWNTASFSNNGSSSSNGSTNSSSFFDNNGTFSWGPENCIKSEKEGEIHAIEGDPEEIKWSEYLQTPYLFGTTIQNQILRPKQNHTSTHKGLVLIGNNNLHNLQIYIIRIFSESLQLTG…	443	Nuclear
maker-HiC_scaffold_13-snap-gene-90.22-mRNA-1	CoMYB110	MGRQPCCDKIGLRRGPWSIEEDHKLMNFILNNGIQCWRLVPKLAGLLRCGKSCRLRWINYLRPDLKRGALTEAEEDMIIQLHSRYGNRWSKIASHFPGRTDNEIKNHWNTRIKKRLKILGLDPITHKPVEQPEMFTTKELDCRVPSSFEQHQMFTTKDEIILQSNSFWNQANNNLERDLHDSLCSKGTSMAISATQPSNASASVSEPVHDDFLQQWIDNPNSMLSWDGFNNLEEIFL	237	Nuclear
maker-HiC_scaffold_13-snap-gene-96.22-mRNA-1	CoMYB111	MGRQPCCDKIGLRRGPWSIEEDHKLMNFILNNGIQCWRLVPKLAGLLRCGKSCRLRWINYLRPDLKRGALTEAEEDMIIQLHSRYGNRWSKIASHFPGRTDNEIKNHWNTRIKKRLKILGLDPITHKPIEQPEMFTTKELDCRVPSSFEQHQMFTTKDEVILQSNSFWNQANNNLEHDLHDSLCSKGTSMAISATQPSNASASVSEPVHEDFLQQWIDNPNSMLSWDGFNNLEEIFL	237	Nuclear
maker-HiC_scaffold_13-snap-gene-410.3-mRNA-1	CoMYB112	MSTAMSTVTQRGSNNGSEEEFELRKGPWTLEEDTLLIHYIADHGEGRWNLLAKCAGLKRTGKSCRLRWLNYLKPDIKRGNLTPQEQLLILELHSKWGNRWSKIAQHLPGRTDNEIKNYWRTRVQKQARQLKIESNSKRFLEAVRCFWMPRLLEQVEQTSSSSPSSSTMETQSSTITSSLLPNHEAPLAFSTPQPNEKPSSVTSSSTICFSDSMRISQLPEFLERPTTPPLDDCYYVDISGYEMEAFNLATMSSVGPCDFSLSDSQMAGSDWISDDVACTLWNMDELWQLRKPEEELGI	298	Nuclear
maker-HiC_scaffold_13-snap-gene-1025.4-mRNA-1	CoMYB113	MEFPQTSVCHLLLPCNIFVLSSLAPCSFLYKKASPLEFVATIIGYSVAMEDEKLRKGPWYEEEDERLTAIVAVMGERRWDLVAKVSGLRRSGKSCRMRWMNYLRPNLKHSRLSAEEERIILQLHKQWGNKWSKIARRLPGRTDNEIKNYWRSHLRKNAQVQEQGNYDQSITNNAKQDVLVPKFDNGDCTSVKENILRTTDDHSDVFELSNYGIASSPYEVRISDWMSSWSDEQSEVNRHHGECQSLDSGFCCYSLWNSEDHSDNGLWDSPDFLWDTD	277	Nuclear
maker-HiC_scaffold_13-snap-gene-1034.5-mRNA-1	CoMYB114	MEFPQTSVCHLLLPCNIFVLSSLAPCSFLYKKASPLEFLATIIGYSVAMEDEKLRKGPWYEEEDERLTAIVAVMGERRWDSVAKVSGLRRSGKSCRMRWMNYLRPNLKHSRLSAEEERIILQLHKQWGNKWSKIARRLPGRTDNEIKNYWRSHLRKNAQVQEQGNYDQSITNNAKQDVLVPKFDNGDCTSVKENILRTTDDHSDVFELSNYGIASSPYEVRISDWMSSWSDEQSEVNRHHGECQSLDSGFCCYSVWNSEDHSDNGLWDSPDFLWDTD	277	Nuclear
maker-HiC_scaffold_13-snap-gene-1063.5-mRNA-1	CoMYB115	MGRAPCCDKASVKRGPWSPEEDAKLKEYIEKNGTGGNWITLPQKAGLRRCGKSCRLRWLNYLRPNIKHGEFSDVEDRIICSLFASIGSRWSIIAAQLPGRTDNDIKNYWNTKLKKKLVGMLSSSHSSSLASKCSNNNNNAYYTSTNQTNSFIGYELPNISTPSSNLLSTTTACSSAQEGYVGPMHTVLMFGGGGDQASCSNSSDGSYNNQISHGREMEHDYYGEHMGFHLQSYAYNGVDHENQNLMISSSGGGDGNGFSVKPNGLLCGETPLIDYYSSLEEIKQLITTNNICSNNNNLNFFADENKTDEKVLYY	314	Nuclear
maker-HiC_scaffold_13-snap-gene-1329.16-mRNA-1	CoMYB116	MDDVTVVAGDTTAADDVDTGGDGDVVAAAAVVGEGSGSGSSGGGQVGKKSSSWDRVKGPWSPEEDAILSRLVSDFGARNWSLIARGISGRSGKSCRLRWCNQLDPAVKRKPFTDEEDRIIVQAHTIHGNKWASIARLLQGRTDNAIKNHWNSTLRRRCMARGKFKLESSNMVEDISLDKSKASSEDTLSCGDVNSFKSFEGKDVSSGENMEEPWEGKAQPQGQSSIEEKEPPTLFHPVARVSAFNVYNPLDGQETVSSFPRLPIPMQRPLLQAVRPDAGMYKLLEGTYGERLIPHQCGHGCCGTESGGKSRSSLLGPEYVDFAEPPFIPTHELAAIATDISNIAWQKSGLDNSSVRAVENLNVRVTSGGPLVQMDHFEESRKNGHLRFEEGKNKLMGMM…	466	Nuclear
maker-HiC_scaffold_14-snap-gene-648.8-mRNA-1	CoMYB117	MGHHSCCNQQKVKRGLWSPEEDEKLIRYITTHGYGCWSEVPEKAGLQRCGKSCRLRWINYLRPDIRRGRFTPEEEKLIISLHGAVGNRWAHIASHLPGRTDNEIKNYWNSWIKKKIRKPATSHPPATNKPSADQHSQFNYATTNHVDFLNQDLVTKPPIQDTLFSSPSPLFMFDTSGSSLEGISADGNERSEFFHEQLGLNSEISTWHMNQQEVPSLPPPVLSFTTSMDLNNYLPPLIENIENMVSMEVQQPNSINEERDMALDCLQRQELNEWVDSQHCPSFLFWDHPDQGPLRGEEEIAPSSSNMGTMLASYPSSL	318	Nuclear
maker-HiC_scaffold_14-snap-gene-768.53-mRNA-1	CoMYB118	MGRQPCCDKLGVKKGPWTAEEDKKLINFILTNGQCCWRAVPKLAGLRRCGKSCRLRWTNYLRPDLKRGLLNEAEEQLVIDLHARLGNRWSKIAARLPGRTDNEIKNHWNTHIKKKLLKMGIDPVTHEPLNEESKPTEASSTSSSSHADHSPESKNNHLQSQKTDNGIPNSEENSSCSPLTENCSGDDPLMSIFLQVDGSWEFPSDGLSFNDNNIGLPSWDEDCAWLLDCQDFGIHDFGIDCFSDVEVINTLN	252	Nuclear
maker-HiC_scaffold_14-snap-gene-826.2-mRNA-1	CoMYB119	MGRRFDEAMLPSNLTPNGASTAAVGAPPPSRQAELQPHSCSALEHLASIDLIELCNEAKVERCRAIRDLRSCGRYVESVLNSCGHASLCTECCQRCDICPICRIPIPRNGNRLRLRLYYECIEAGLISKKCDDRFQEKEDGERQIAADIERLYSLFDVALENNLMLQMFVWMKMLSQVILSLLSYWMKWLSRIDSHTVQEMKMQLSSLLKFSVKLAGISNVLEVLESSFKGALSAQLHDLHHLQESILKTKQHMEMMIWCIRHHFLENVKPRYTNITSWRAAVRERKSAAIMRSWPDSVNNSVGSGRTNGSTLFIEDALSNIDIDQGYTHEMAGELEIASLQKDESSSFFRSKIEGMAGCYPFENLRAAADVLFLHGSSDLVLAKQAIFLYYLFDQHWT…	1444	Nuclear
snap_masked-HiC_scaffold_14-processed-gene-846.18-mRNA-1	CoMYB120	MEGAGGGGFGYVNLQNNPSLYRPSPPLTAIERFLSSKNNHFSQKQTQNNVHNQGLLVPASVYGGFSSSGGAIDGYSSDFLGPSFPEKSFMDWLFHDSETLKWTYEIDPNMGLSEDNKSAERNCKGVAKRAKCGSSTTTLIKGQWTDEEDRKLLNLVTQHGVRKWAQIAENMVGRAGKQCRERWHNHLRPDIKKDTWTEEEESILVEAHKKVGNKWAEIAKRIPGRTENSIKNRWNATKRKQNSKRNNIKKPQGSQNGKSQSQPSILQDYIKSMNPSNRAAATTGSTVTEDFLTHFAPLGDLSESSIDDSPQFMNKTFDDELNFMINFFGTKNDQPLNDKNNSKASIEAKTAQNNHSKSVSALNSLGLLNNTNGDDQLLNDMVADTNMFINAPNKELPIT…	438	Nuclear
maker-HiC_scaffold_15-snap-gene-202.36-mRNA-1	CoMYB121	MAPRNVNNGAGKKVYNKGAWTSEEDRKLTRYIGVHGAKKWKTVATKSGLNRCGKSCRLRWLNYLRPNIKRGNISDEEEDLIVRLHKLLGNRWSLIAGRLPGRTDNEIKNYWNSHLNKKINKGKTTSTSTAQERTTPEAAAGVAEVEREGGRESRNAEVTFNVNEFFDFSTEGTNGLEWVNKFLELDDDQWLSEKR	195	Nuclear
maker-HiC_scaffold_15-snap-gene-277.6-mRNA-1	CoMYB122	MVRVPCCDENSGLIKKGPWTPEEDQKLLDYVQLHGRGSWRALPKRAGLNRCGKSCRLRWTNYLRPDIKRGKYSDEEEQIIINLHSVLGNKWSKIAFHLPGRTDNEIKNHWNTHLRKKLLQRGIDPQTHKPISDLNLFANLAHLLYASNLTNLMNPWDNNNAFRQHSDATTQLAKIQLLQTMMQVINTTTPLPNIAQTQTSLSGHYNKNNTTIPQQAPLEFPNLDVNVNSQQQFNDFADIDKAIAWFGDGFQPQVVGASCNNMNSDCHTQSSESALPSINQGESKIDPTYPSTQSPTSNIFEAWEKLLDDEGHSWEDIP	318	Nuclear
maker-HiC_scaffold_15-snap-gene-280.27-mRNA-1	CoMYB123	MVRAPCCDENSGLIKKGPWTPEEDEKLLDYVQLHGHGSWRALPKRAGLNRCGKSCRLRWTNYLRPDIKRGKYSDEEEQIIINLHSVLGNKWSKIASHLPGRTDNEIKNHWNTHLRKKLLQRGIDPQTHKPISDLNLLSNLAHLLYASNLTNLMNPWDNNNAFRQHSDATTQLVKIQLLQTMMQVINTTTPLPNIAQTQTSLSGHYNNNNTTIPQQASLEFPNLDVNVNSQQQFNDFADIDKAIAWFGDGFQPQVVGANCNNMNSDCHTQSSESALPSINQVESKIGPTYPSTQSPTSNIFEAWEKFLDDEGHSWEDIL	318	Nuclear
maker-HiC_scaffold_15-snap-gene-460.22-mRNA-1	CoMYB124	MGRAPCCDKTKVKKGPWSPDEDQTLKDYLHKHGTGGNWIALPPKAGSLSLSLSCYANLCVAILCFEGKFAHTCFILTFFSMFEAMREELSTEMAKLPETRHQAWRWSVIASHLPGRTDNDVKNHWNTKLKKKLLPLKTNIANTFNNPIPSMSLLPKTEPYNTTTNNSSFLALLNQSPLSMSSLTNLTCELNNTTNTQSLTNYPIHQYPLPELPEQFKFGASLKKSYVNSSSSSQDSANSNVVDVGFLMDLGTSGILHCEQVGSEVWCEETISEIGTSYADLVESCCYADTKPPPGLVYQCDQSVTNNTNINQY	313	Extracellular
maker-HiC_scaffold_15-snap-gene-797.11-mRNA-1	CoMYB125	MANKCVLYAPKNNTNGMSCYNSTKTTVSSLSSSSSSSSSSSSPFGAFMGMVFADMGSLSITPLNLGSASTSVASSSQESFLCKSSEMENEKRTWGFPFMGEGNGCDCSDGFGENNEAIDLNASFNEEKKANIYAGSGSAKETDFGQSKLCARGHWRPAEDAKLKELVALYGPQNWNLIAEKLEGRSGKSCRLRWFNQLDPRINRKAFSEEEEERLMAAHRLYGNKWAMIARLFPGRTDNAVKNHWHVIMARKYREQSSAYRRRKMAQSVYKRMEEDPSFVYTATRTETPPPPPPYCFNLSNGGLHHSSPFPFPKFNGGGGEAISSSNVPIHHSGFCAQQTPDFLPGHKSQKRVMGIFNRPWDRTGNEPNISHLNHPHQRQAPLVTAMQQSLYHHYPPSF…	442	Nuclear
maker-HiC_scaffold_15-snap-gene-824.27-mRNA-1	CoMYB126	MGRSPCCENVGLKRGTWTPEEDQKLLAYIEEHGHGSWPALPAKAGLQRCGKSCRLRWTNYLRPDIKRGKFSLQEEQSIIQLHALLGNRWSAIATHLPKRTDNEIKNYWNSHLKKRLTKMGIDPVTHKPKSDSLNPGQLKVAATLSHIAQWESARLEAEARATRIVRESTLLRSFSSSSAQLILNKANALPPLLPPPPLPLQPLCLDVLTACKGAWLTTLLKENGSTITGTLEAPTSTLNFSDKQLWIPNFGKSNNDIGEVKESMENTVLVPNFMEGLTDLFTQNSHDHLDHDLNYFEENNNYWNNILNLVNSTSPSIGSPVF	322	Nuclear
genemark-scaffold_8_fragment_4-processed-gene-0.3-mRNA-1	CoMYB127	MVRAPCCEKMGLKRGPWTPEEDHILINYINLYGHSNWRALPKQAGLLRCGKSCRLRWANYLKPDIKRGNFSEEEEETIIKLHEKLGNRWSAIAARLPGRTDNEIKNVWHTHLKKRLKQKQPTQLELEIKPPHSIKSQKNDQVTEKEPEEATMTYPNAVVRFQSPEHSASDISSITTTSTDNTTTTNTTSMDDHAFDNFPVMDENFWSDVFPADNSGEMDDFPVAGADPDAQFQLSPRLHAMEHVCGGYNSSMHDGMDFWFNLFTKAGGLPELPEF	275	Nuclear
genemark-scaffold_528_fragment_2-processed-gene-0.1-mRNA-1	CoMYB128	MVRAPCCEKMGLKRGPWTPEEDHILINYINLYGHSNWRALPKQAGLLRCGKSCRLRWANYLKPDIKRGNFSEEEEETIIKLHEKLGNRWSAIAARLPGRTDNEIKNVWHTHLKKRLKQKQPTQLELEIKPPHSIKSQKNDQVTEKEPEEATMTYPNAVVRFQSPEHSASDISSITTTSTDNTTTTNTTSMDDHAFDNFPVMDENFWSDVFPADNSGEMDDFPVAGADPDAQFQLSPRLHAMEHVCGGYNSSMHDGMDFWFNLFTKAGGLPELPEF	275	Nuclear

## Sheet: Table S4
Table S4. Motifs of CoR2R3-MYB transcription factors
Motif	Length	Protein sequence
Motif 1	29	GNRWSAIAARLPGRTDNEIKNYWNTHLKK
Motif 2	29	LPKLAGLLRCGKSCRLRWTNYLRPDJKRG
Motif 3	21	LKKGPWTPEEDEKLIAYIQKH
Motif 4	15	FSPEEEDLIIELHAL
Motif 5	11	MGRAPCCDKNG
Motif 6	15	KLJQMGIDPVTHKPR
Motif 7	50	GGGGGFGYVNLQNNPSLYRPSPPLTAIEMFLSSKNNHFSHQQTQNNVHNQ
Motif 8	50	SMDASETFPZIDENFWSEELSADNSTMQSDFSSFAAELZSQFPLSPSHTA
Motif 9	50	GFSSSGGAIGGYSSNFLGPSFPEKSFIDGLFHDSETLKWTYEIDPNMGLS
Motif 10	41	NIKKPQGSQNGKSQSQPSILQDYIKSMNPSKRAATTTGSTV

## Sheet: Table S5
Table S5. Exon numbers within CoR2R3-MYBs
Exon number	number
1	6
2	19
3	88
4	13
5	1
21	1

## Sheet: Table S6
Table S6. Intron distribution patterns within CoR2R3-MYB DNA-binding domains
Pattern A	Pattern B	Pattern C	Pattern D	Pattern E	Pattern F	Pattern G	Pattern H	Pattern I	Pattern J	Pattern K
CoMYB81	CoMYB72	CoMYB84	CoMYB89	CoMYB108	CoMYB119	CoMYB106	CoMYB41	CoMYB71	CoMYB58	CoMYB29
CoMYB82	CoMYB116		CoMYB91			CoMYB64	CoMYB9			CoMYB124
CoMYB18	CoMYB28		CoMYB90			CoMYB88	CoMYB53
CoMYB65	CoMYB42		CoMYB56			CoMYB4	CoMYB113
CoMYB2	CoMYB43		CoMYB57			CoMYB74	CoMYB114
CoMYB17	CoMYB21		CoMYB69			CoMYB118	CoMYB112
CoMYB73	CoMYB46		CoMYB62			CoMYB16	CoMYB61
CoMYB13	CoMYB47		CoMYB22			CoMYB1	CoMYB6
	CoMYB101		CoMYB120			CoMYB50	CoMYB51
	CoMYB125		CoMYB25			CoMYB122	CoMYB52
	CoMYB30		CoMYB24			CoMYB123	CoMYB92
	CoMYB31		CoMYB23			CoMYB75	CoMYB109
	CoMYB32		CoMYB26			CoMYB76	CoMYB3
	CoMYB5						CoMYB177
							CoMYB68
							CoMYB110
							CoMYB111
							CoMYB77
							CoMYB36
							CoMYB103
							CoMYB54
							CoMYB67
							CoMYB105
							CoMYB121
							CoMYB66
							CoMYB55
							CoMYB100
							CoMYB97
							CoMYB98
							CoMYB96
							CoMYB95
							CoMYB12
							CoMYB35
							CoMYB94
							CoMYB128
							CoMYB127
							CoMYB49
							CoMYB7
							CoMYB8
							CoMYB37
							CoMYB39
							CoMYB38
							CoMYB40
							CoMYB93
							CoMYB107
							CoMYB10
							CoMYB11
							CoMYB99
							CoMYB34
							CoMYB33
							CoMYB102
							CoMYB126
							CoMYB83
							CoMYB78
							CoMYB79
							CoMYB44
							CoMYB19
							CoMYB20
							CoMYB85
							CoMYB45
							CoMYB60
							CoMYB70
							CoMYB14
							CoMYB15
							CoMYB59
							CoMYB86
							CoMYB87
							CoMYB104
							CoMYB80
							CoMYB115
							CoMYB27
							CoMYB48
							CoMYB63

## Sheet: Table S7
Table S7. Chromosomal location
Gene ID	Gene Name	Chromosome ID	Chromosome name
snap_masked-HiC_scaffold_1-processed-gene-39.14-mRNA-1	CoMYB1	HiC_scaffold_1	Chr01
snap_masked-HiC_scaffold_1-processed-gene-240.42-mRNA-1	CoMYB2	HiC_scaffold_1	Chr01
maker-HiC_scaffold_1-snap-gene-677.0-mRNA-1	CoMYB3	HiC_scaffold_1	Chr01
maker-HiC_scaffold_1-snap-gene-1407.4-mRNA-1	CoMYB4	HiC_scaffold_1	Chr01
maker-HiC_scaffold_1-snap-gene-2153.40-mRNA-1	CoMYB5	HiC_scaffold_1	Chr01
maker-HiC_scaffold_2-snap-gene-21.38-mRNA-1	CoMYB6	HiC_scaffold_2	Chr02
maker-HiC_scaffold_2-snap-gene-325.24-mRNA-1	CoMYB7	HiC_scaffold_2	Chr02
maker-HiC_scaffold_2-snap-gene-387.0-mRNA-1	CoMYB8	HiC_scaffold_2	Chr02
maker-HiC_scaffold_2-snap-gene-433.32-mRNA-1	CoMYB9	HiC_scaffold_2	Chr02
maker-HiC_scaffold_2-snap-gene-1022.15-mRNA-1	CoMYB10	HiC_scaffold_2	Chr02
maker-HiC_scaffold_2-snap-gene-1026.16-mRNA-1	CoMYB11	HiC_scaffold_2	Chr02
maker-HiC_scaffold_2-snap-gene-1151.65-mRNA-1	CoMYB12	HiC_scaffold_2	Chr02
snap_masked-HiC_scaffold_2-processed-gene-1606.10-mRNA-1	CoMYB13	HiC_scaffold_2	Chr02
maker-HiC_scaffold_2-snap-gene-1882.24-mRNA-1	CoMYB14	HiC_scaffold_2	Chr02
snap_masked-HiC_scaffold_2-processed-gene-1884.3-mRNA-1	CoMYB15	HiC_scaffold_2	Chr02
maker-HiC_scaffold_3-snap-gene-58.1-mRNA-1	CoMYB16	HiC_scaffold_3	Chr03
augustus_masked-HiC_scaffold_3-processed-gene-155.9-mRNA-1	CoMYB17	HiC_scaffold_3	Chr03
maker-HiC_scaffold_3-snap-gene-205.3-mRNA-1	CoMYB18	HiC_scaffold_3	Chr03
maker-HiC_scaffold_3-snap-gene-359.16-mRNA-1	CoMYB19	HiC_scaffold_3	Chr03
maker-HiC_scaffold_3-snap-gene-375.35-mRNA-1	CoMYB20	HiC_scaffold_3	Chr03
genemark-HiC_scaffold_3-processed-gene-560.1-mRNA-1	CoMYB21	HiC_scaffold_3	Chr03
maker-HiC_scaffold_3-snap-gene-1264.29-mRNA-1	CoMYB22	HiC_scaffold_3	Chr03
maker-HiC_scaffold_3-snap-gene-1265.21-mRNA-1	CoMYB23	HiC_scaffold_3	Chr03
snap_masked-HiC_scaffold_3-processed-gene-1266.4-mRNA-1	CoMYB24	HiC_scaffold_3	Chr03
snap_masked-HiC_scaffold_3-processed-gene-1266.14-mRNA-1	CoMYB25	HiC_scaffold_3	Chr03
maker-HiC_scaffold_3-snap-gene-1267.32-mRNA-1	CoMYB26	HiC_scaffold_3	Chr03
maker-HiC_scaffold_3-snap-gene-1647.2-mRNA-1	CoMYB27	HiC_scaffold_3	Chr03
maker-HiC_scaffold_3-snap-gene-1770.5-mRNA-1	CoMYB28	HiC_scaffold_3	Chr03
maker-HiC_scaffold_4-snap-gene-41.25-mRNA-1	CoMYB29	HiC_scaffold_4	Chr04
snap_masked-HiC_scaffold_4-processed-gene-45.24-mRNA-1	CoMYB30	HiC_scaffold_4	Chr04
maker-HiC_scaffold_4-snap-gene-58.17-mRNA-1	CoMYB31	HiC_scaffold_4	Chr04
maker-HiC_scaffold_4-snap-gene-75.21-mRNA-1	CoMYB32	HiC_scaffold_4	Chr04
maker-HiC_scaffold_4-snap-gene-477.0-mRNA-1	CoMYB33	HiC_scaffold_4	Chr04
maker-HiC_scaffold_4-snap-gene-1364.13-mRNA-1	CoMYB34	HiC_scaffold_4	Chr04
maker-HiC_scaffold_4-snap-gene-1384.3-mRNA-1	CoMYB35	HiC_scaffold_4	Chr04
maker-HiC_scaffold_5-snap-gene-54.1-mRNA-1	CoMYB36	HiC_scaffold_5	Chr05
maker-HiC_scaffold_5-snap-gene-301.9-mRNA-1	CoMYB37	HiC_scaffold_5	Chr05
maker-HiC_scaffold_5-snap-gene-302.5-mRNA-1	CoMYB38	HiC_scaffold_5	Chr05
maker-HiC_scaffold_5-snap-gene-325.4-mRNA-1	CoMYB39	HiC_scaffold_5	Chr05
maker-HiC_scaffold_5-snap-gene-326.1-mRNA-1	CoMYB40	HiC_scaffold_5	Chr05
augustus_masked-HiC_scaffold_5-processed-gene-376.4-mRNA-1	CoMYB41	HiC_scaffold_5	Chr05
maker-HiC_scaffold_5-snap-gene-958.26-mRNA-1	CoMYB42	HiC_scaffold_5	Chr05
maker-HiC_scaffold_5-snap-gene-966.1-mRNA-1	CoMYB43	HiC_scaffold_5	Chr05
maker-HiC_scaffold_5-snap-gene-1158.13-mRNA-1	CoMYB44	HiC_scaffold_5	Chr05
maker-HiC_scaffold_6-snap-gene-512.7-mRNA-1	CoMYB45	HiC_scaffold_6	Chr06
maker-HiC_scaffold_6-snap-gene-549.25-mRNA-1	CoMYB46	HiC_scaffold_6	Chr06
maker-HiC_scaffold_6-snap-gene-607.20-mRNA-1	CoMYB47	HiC_scaffold_6	Chr06
maker-HiC_scaffold_6-snap-gene-784.6-mRNA-1	CoMYB48	HiC_scaffold_6	Chr06
maker-HiC_scaffold_6-snap-gene-880.29-mRNA-1	CoMYB49	HiC_scaffold_6	Chr06
maker-HiC_scaffold_6-snap-gene-1082.22-mRNA-1	CoMYB50	HiC_scaffold_6	Chr06
maker-HiC_scaffold_7-snap-gene-46.3-mRNA-1	CoMYB51	HiC_scaffold_7	Chr07
maker-HiC_scaffold_7-snap-gene-53.4-mRNA-1	CoMYB52	HiC_scaffold_7	Chr07
maker-HiC_scaffold_7-snap-gene-124.2-mRNA-1	CoMYB53	HiC_scaffold_7	Chr07
maker-HiC_scaffold_7-snap-gene-171.44-mRNA-1	CoMYB54	HiC_scaffold_7	Chr07
maker-HiC_scaffold_7-snap-gene-176.32-mRNA-1	CoMYB55	HiC_scaffold_7	Chr07
maker-HiC_scaffold_7-snap-gene-946.32-mRNA-2	CoMYB56	HiC_scaffold_7	Chr07
maker-HiC_scaffold_7-snap-gene-950.21-mRNA-2	CoMYB57	HiC_scaffold_7	Chr07
maker-HiC_scaffold_7-snap-gene-956.15-mRNA-1	CoMYB58	HiC_scaffold_7	Chr07
maker-HiC_scaffold_7-snap-gene-991.4-mRNA-1	CoMYB59	HiC_scaffold_7	Chr07
maker-HiC_scaffold_7-snap-gene-1011.20-mRNA-1	CoMYB60	HiC_scaffold_7	Chr07
snap_masked-HiC_scaffold_7-processed-gene-1096.26-mRNA-1	CoMYB61	HiC_scaffold_7	Chr07
maker-HiC_scaffold_8-snap-gene-432.15-mRNA-1	CoMYB62	HiC_scaffold_8	Chr08
maker-HiC_scaffold_8-snap-gene-617.21-mRNA-1	CoMYB63	HiC_scaffold_8	Chr08
maker-HiC_scaffold_8-snap-gene-1085.20-mRNA-2	CoMYB64	HiC_scaffold_8	Chr08
augustus_masked-HiC_scaffold_8-processed-gene-1091.18-mRNA-1	CoMYB65	HiC_scaffold_8	Chr08
maker-HiC_scaffold_9-snap-gene-69.3-mRNA-1	CoMYB66	HiC_scaffold_9	Chr09
maker-HiC_scaffold_9-snap-gene-74.16-mRNA-1	CoMYB67	HiC_scaffold_9	Chr09
maker-HiC_scaffold_9-snap-gene-109.0-mRNA-1	CoMYB68	HiC_scaffold_9	Chr09
maker-HiC_scaffold_9-snap-gene-718.16-mRNA-1	CoMYB69	HiC_scaffold_9	Chr09
maker-HiC_scaffold_9-snap-gene-879.2-mRNA-1	CoMYB70	HiC_scaffold_9	Chr09
maker-HiC_scaffold_9-snap-gene-1092.0-mRNA-1	CoMYB71	HiC_scaffold_9	Chr09
snap_masked-HiC_scaffold_10-processed-gene-372.26-mRNA-1	CoMYB72	HiC_scaffold_10	Chr10
augustus_masked-HiC_scaffold_10-processed-gene-442.21-mRNA-1	CoMYB73	HiC_scaffold_10	Chr10
maker-HiC_scaffold_10-snap-gene-678.2-mRNA-1	CoMYB74	HiC_scaffold_10	Chr10
snap_masked-HiC_scaffold_10-processed-gene-1123.48-mRNA-1	CoMYB75	HiC_scaffold_10	Chr10
snap_masked-HiC_scaffold_10-processed-gene-1143.20-mRNA-1	CoMYB76	HiC_scaffold_10	Chr10
maker-HiC_scaffold_10-snap-gene-1250.0-mRNA-1	CoMYB77	HiC_scaffold_10	Chr10
maker-HiC_scaffold_10-snap-gene-1376.7-mRNA-1	CoMYB78	HiC_scaffold_10	Chr10
maker-HiC_scaffold_10-snap-gene-1385.38-mRNA-1	CoMYB79	HiC_scaffold_10	Chr10
maker-HiC_scaffold_10-snap-gene-1732.9-mRNA-1	CoMYB80	HiC_scaffold_10	Chr10
augustus_masked-HiC_scaffold_10-processed-gene-1783.11-mRNA-1	CoMYB81	HiC_scaffold_10	Chr10
augustus_masked-HiC_scaffold_10-processed-gene-1785.20-mRNA-1	CoMYB82	HiC_scaffold_10	Chr10
maker-HiC_scaffold_10-snap-gene-1975.30-mRNA-1	CoMYB83	HiC_scaffold_10	Chr10
maker-HiC_scaffold_10-snap-gene-1978.2-mRNA-1	CoMYB84	HiC_scaffold_10	Chr10
maker-HiC_scaffold_10-snap-gene-1988.31-mRNA-1	CoMYB85	HiC_scaffold_10	Chr10
maker-HiC_scaffold_10-snap-gene-2020.38-mRNA-1	CoMYB86	HiC_scaffold_10	Chr10
maker-HiC_scaffold_10-snap-gene-2037.31-mRNA-1	CoMYB87	HiC_scaffold_10	Chr10
maker-HiC_scaffold_10-snap-gene-2072.64-mRNA-1	CoMYB88	HiC_scaffold_10	Chr10
genemark-HiC_scaffold_10-processed-gene-2075.18-mRNA-1	CoMYB89	HiC_scaffold_10	Chr10
genemark-HiC_scaffold_10-processed-gene-2077.75-mRNA-1	CoMYB90	HiC_scaffold_10	Chr10
genemark-HiC_scaffold_10-processed-gene-2080.18-mRNA-1	CoMYB91	HiC_scaffold_10	Chr10
maker-HiC_scaffold_11-snap-gene-183.12-mRNA-1	CoMYB92	HiC_scaffold_11	Chr11
maker-HiC_scaffold_11-snap-gene-199.32-mRNA-1	CoMYB93	HiC_scaffold_11	Chr11
maker-HiC_scaffold_11-snap-gene-972.36-mRNA-1	CoMYB94	HiC_scaffold_11	Chr11
maker-HiC_scaffold_11-snap-gene-1222.2-mRNA-1	CoMYB95	HiC_scaffold_11	Chr11
maker-HiC_scaffold_11-snap-gene-1223.28-mRNA-1	CoMYB96	HiC_scaffold_11	Chr11
maker-HiC_scaffold_11-snap-gene-1227.45-mRNA-1	CoMYB97	HiC_scaffold_11	Chr11
maker-HiC_scaffold_11-snap-gene-1231.5-mRNA-1	CoMYB98	HiC_scaffold_11	Chr11
maker-HiC_scaffold_11-snap-gene-1234.2-mRNA-1	CoMYB99	HiC_scaffold_11	Chr11
maker-HiC_scaffold_11-snap-gene-1777.28-mRNA-1	CoMYB100	HiC_scaffold_11	Chr11
maker-HiC_scaffold_12-snap-gene-173.3-mRNA-1	CoMYB101	HiC_scaffold_12	Chr12
maker-HiC_scaffold_12-snap-gene-179.51-mRNA-1	CoMYB102	HiC_scaffold_12	Chr12
maker-HiC_scaffold_12-snap-gene-396.17-mRNA-1	CoMYB103	HiC_scaffold_12	Chr12
maker-HiC_scaffold_12-snap-gene-482.29-mRNA-1	CoMYB104	HiC_scaffold_12	Chr12
maker-HiC_scaffold_12-snap-gene-631.18-mRNA-1	CoMYB105	HiC_scaffold_12	Chr12
maker-HiC_scaffold_12-snap-gene-812.40-mRNA-1	CoMYB106	HiC_scaffold_12	Chr12
maker-HiC_scaffold_12-snap-gene-963.18-mRNA-1	CoMYB107	HiC_scaffold_12	Chr12
maker-HiC_scaffold_12-snap-gene-1194.8-mRNA-1	CoMYB108	HiC_scaffold_12	Chr12
maker-HiC_scaffold_12-snap-gene-1846.18-mRNA-1	CoMYB109	HiC_scaffold_12	Chr12
maker-HiC_scaffold_13-snap-gene-90.22-mRNA-1	CoMYB110	HiC_scaffold_13	Chr13
maker-HiC_scaffold_13-snap-gene-96.22-mRNA-1	CoMYB111	HiC_scaffold_13	Chr13
maker-HiC_scaffold_13-snap-gene-410.3-mRNA-1	CoMYB112	HiC_scaffold_13	Chr13
maker-HiC_scaffold_13-snap-gene-1025.4-mRNA-1	CoMYB113	HiC_scaffold_13	Chr13
maker-HiC_scaffold_13-snap-gene-1034.5-mRNA-1	CoMYB114	HiC_scaffold_13	Chr13
maker-HiC_scaffold_13-snap-gene-1063.5-mRNA-1	CoMYB115	HiC_scaffold_13	Chr13
maker-HiC_scaffold_13-snap-gene-1329.16-mRNA-1	CoMYB116	HiC_scaffold_13	Chr13
maker-HiC_scaffold_14-snap-gene-648.8-mRNA-1	CoMYB117	HiC_scaffold_14	Chr14
maker-HiC_scaffold_14-snap-gene-768.53-mRNA-1	CoMYB118	HiC_scaffold_14	Chr14
maker-HiC_scaffold_14-snap-gene-826.2-mRNA-1	CoMYB119	HiC_scaffold_14	Chr14
snap_masked-HiC_scaffold_14-processed-gene-846.18-mRNA-1	CoMYB120	HiC_scaffold_14	Chr14
maker-HiC_scaffold_15-snap-gene-202.36-mRNA-1	CoMYB121	HiC_scaffold_15	Chr15
maker-HiC_scaffold_15-snap-gene-277.6-mRNA-1	CoMYB122	HiC_scaffold_15	Chr15
maker-HiC_scaffold_15-snap-gene-280.27-mRNA-1	CoMYB123	HiC_scaffold_15	Chr15
maker-HiC_scaffold_15-snap-gene-460.22-mRNA-1	CoMYB124	HiC_scaffold_15	Chr15
maker-HiC_scaffold_15-snap-gene-797.11-mRNA-1	CoMYB125	HiC_scaffold_15	Chr15
maker-HiC_scaffold_15-snap-gene-824.27-mRNA-1	CoMYB126	HiC_scaffold_15	Chr15
genemark-scaffold_8_fragment_4-processed-gene-0.3-mRNA-1	CoMYB127	scaffold_8_fragment_4	scaffold_8_fragment_4
genemark-scaffold_528_fragment_2-processed-gene-0.1-mRNA-1	CoMYB128	scaffold_528_fragment_2	scaffold_528_fragment_2

## Sheet: Table S8
Table S8. syngeneic R2R3-MYB gene pairs and KaKs values in C. oleifera
Seq_1	Seq_2	Ka	Ks	Ka/Ks	Note
maker-HiC_scaffold_1-snap-gene-677.0-mRNA-1	maker-HiC_scaffold_12-snap-gene-1846.18-mRNA-1	1.02516	NaN	NaN	High Sequence Divergence Value (pS>=0.75)
snap_masked-HiC_scaffold_1-processed-gene-240.42-mRNA-1	maker-HiC_scaffold_3-snap-gene-205.3-mRNA-1	0.449297	2.2939	0.195866
snap_masked-HiC_scaffold_1-processed-gene-39.14-mRNA-1	maker-HiC_scaffold_3-snap-gene-58.1-mRNA-1	0.232741	1.39046	0.167384
maker-HiC_scaffold_10-snap-gene-1376.7-mRNA-1	maker-HiC_scaffold_10-snap-gene-1385.38-mRNA-1	0	0	NaN
maker-HiC_scaffold_10-snap-gene-2020.38-mRNA-1	maker-HiC_scaffold_10-snap-gene-2037.31-mRNA-1	0.00268697	0	NaN
snap_masked-HiC_scaffold_10-processed-gene-1123.48-mRNA-1	snap_masked-HiC_scaffold_10-processed-gene-1143.20-mRNA-1	0.0065025	0.0187901	0.34606
maker-HiC_scaffold_10-snap-gene-1975.30-mRNA-1	maker-HiC_scaffold_12-snap-gene-179.51-mRNA-1	0.208534	1.46565	0.14228
maker-HiC_scaffold_10-snap-gene-1978.2-mRNA-1	maker-HiC_scaffold_12-snap-gene-173.3-mRNA-1	0.36014	1.29034	0.279104
maker-HiC_scaffold_10-snap-gene-1975.30-mRNA-1	maker-HiC_scaffold_15-snap-gene-824.27-mRNA-1	0.235011	1.88041	0.124978
maker-HiC_scaffold_10-snap-gene-1978.2-mRNA-1	maker-HiC_scaffold_15-snap-gene-797.11-mRNA-1	0.385659	1.53653	0.250994
snap_masked-HiC_scaffold_10-processed-gene-372.26-mRNA-1	maker-HiC_scaffold_3-snap-gene-1770.5-mRNA-1	0.332084	1.19356	0.278229
maker-HiC_scaffold_10-snap-gene-1385.38-mRNA-1	maker-HiC_scaffold_3-snap-gene-375.35-mRNA-1	0.228971	1.54549	0.148155
maker-HiC_scaffold_10-snap-gene-1376.7-mRNA-1	maker-HiC_scaffold_5-snap-gene-1158.13-mRNA-1	0.275197	1.75699	0.15663
maker-HiC_scaffold_10-snap-gene-2072.64-mRNA-1	maker-HiC_scaffold_7-snap-gene-46.3-mRNA-1	0.140707	0.755402	0.186268
maker-HiC_scaffold_10-snap-gene-1988.31-mRNA-1	maker-HiC_scaffold_7-snap-gene-1011.20-mRNA-1	0.226748	1.40956	0.160864
maker-HiC_scaffold_10-snap-gene-2020.38-mRNA-1	maker-HiC_scaffold_7-snap-gene-991.4-mRNA-1	0.397093	1.77372	0.223876
maker-HiC_scaffold_10-snap-gene-2037.31-mRNA-1	maker-HiC_scaffold_7-snap-gene-991.4-mRNA-1	0.394668	1.77372	0.222509
maker-HiC_scaffold_10-snap-gene-2073.56-mRNA-1	maker-HiC_scaffold_7-snap-gene-946.32-mRNA-2	0.489016	1.96424	0.24896
maker-HiC_scaffold_10-snap-gene-1250.0-mRNA-1	snap_masked-HiC_scaffold_7-processed-gene-1190.12-mRNA-1	0.178027	0.565656	0.314728
maker-HiC_scaffold_11-snap-gene-182.5-mRNA-1	maker-HiC_scaffold_11-snap-gene-199.32-mRNA-1	0.992526	NaN	NaN	High Sequence Divergence Value (pS>=0.75)
maker-HiC_scaffold_12-snap-gene-482.29-mRNA-1	genemark-HiC_scaffold_14-processed-gene-493.49-mRNA-1	0.249545	0.538323	0.463559
maker-HiC_scaffold_12-snap-gene-173.3-mRNA-1	maker-HiC_scaffold_15-snap-gene-797.11-mRNA-1	0.188929	0.483936	0.3904
maker-HiC_scaffold_12-snap-gene-179.51-mRNA-1	maker-HiC_scaffold_15-snap-gene-824.27-mRNA-1	0.146553	0.95722	0.153103
maker-HiC_scaffold_13-snap-gene-1063.5-mRNA-1	maker-HiC_scaffold_3-snap-gene-1647.2-mRNA-1	0.759597	NaN	NaN	High Sequence Divergence Value (pS>=0.75)
maker-HiC_scaffold_13-snap-gene-1329.16-mRNA-1	maker-HiC_scaffold_3-snap-gene-1770.5-mRNA-1	0.953385	NaN	NaN	High Sequence Divergence Value (pS>=0.75)
maker-HiC_scaffold_13-snap-gene-410.3-mRNA-1	snap_masked-HiC_scaffold_7-processed-gene-1096.26-mRNA-1	0.274643	0.928814	0.295692
maker-HiC_scaffold_13-snap-gene-1063.5-mRNA-1	maker-HiC_scaffold_8-snap-gene-617.21-mRNA-1	0.233771	1.00806	0.231902
maker-HiC_scaffold_13-snap-gene-410.3-mRNA-1	maker-HiC_scaffold_9-snap-gene-1092.0-mRNA-1	0.261279	1.05285	0.248164
maker-HiC_scaffold_14-snap-gene-976.11-mRNA-1	maker-HiC_scaffold_15-snap-gene-277.6-mRNA-1	0.894439	NaN	NaN	High Sequence Divergence Value (pS>=0.75)
maker-HiC_scaffold_14-snap-gene-1163.31-mRNA-1	maker-HiC_scaffold_15-snap-gene-460.22-mRNA-1	0.36594	0.773411	0.473151
maker-HiC_scaffold_2-snap-gene-325.24-mRNA-1	maker-HiC_scaffold_2-snap-gene-387.0-mRNA-1	0.0139395	0.0284125	0.490611
maker-HiC_scaffold_2-snap-gene-387.0-mRNA-1	maker-HiC_scaffold_5-snap-gene-301.9-mRNA-1	0.148449	0.673192	0.220515
maker-HiC_scaffold_2-snap-gene-387.0-mRNA-1	maker-HiC_scaffold_5-snap-gene-325.4-mRNA-1	0.149768	0.654049	0.228986
maker-HiC_scaffold_2-snap-gene-433.32-mRNA-1	augustus_masked-HiC_scaffold_5-processed-gene-376.4-mRNA-1	0.127366	0.542311	0.234858
maker-HiC_scaffold_2-snap-gene-387.0-mRNA-1	maker-HiC_scaffold_6-snap-gene-880.29-mRNA-1	0.33077	1.23613	0.267585
maker-HiC_scaffold_3-snap-gene-375.35-mRNA-1	maker-HiC_scaffold_5-snap-gene-1158.13-mRNA-1	0.117901	0.649576	0.181505
genemark-HiC_scaffold_3-processed-gene-560.1-mRNA-1	maker-HiC_scaffold_5-snap-gene-966.1-mRNA-1	0.104047	0.460031	0.226174
maker-HiC_scaffold_3-snap-gene-1647.2-mRNA-1	maker-HiC_scaffold_6-snap-gene-784.6-mRNA-1	0.687555	NaN	NaN	High Sequence Divergence Value (pS>=0.75)
maker-HiC_scaffold_3-snap-gene-1264.29-mRNA-1	maker-HiC_scaffold_8-snap-gene-432.15-mRNA-1	0.237722	0.709422	0.335092
maker-HiC_scaffold_3-snap-gene-1647.2-mRNA-1	maker-HiC_scaffold_8-snap-gene-617.21-mRNA-1	0.890245	NaN	NaN	High Sequence Divergence Value (pS>=0.75)
maker-HiC_scaffold_4-snap-gene-477.0-mRNA-1	maker-HiC_scaffold_4-snap-gene-1364.13-mRNA-1	0.103048	0.522124	0.197362
maker-HiC_scaffold_4-snap-gene-58.17-mRNA-1	maker-HiC_scaffold_4-snap-gene-75.21-mRNA-1	0.00127362	0	NaN
maker-HiC_scaffold_4-snap-gene-41.25-mRNA-1	snap_masked-HiC_scaffold_4-processed-gene-62.2-mRNA-1	0.211961	0.71683	0.295692
snap_masked-HiC_scaffold_4-processed-gene-45.24-mRNA-1	maker-HiC_scaffold_4-snap-gene-58.17-mRNA-1	0.158382	0.530511	0.298546
maker-HiC_scaffold_5-snap-gene-325.4-mRNA-1	maker-HiC_scaffold_6-snap-gene-880.29-mRNA-1	0.273236	1.36064	0.200815
maker-HiC_scaffold_6-snap-gene-549.25-mRNA-1	maker-HiC_scaffold_6-snap-gene-607.20-mRNA-1	0	0	NaN
maker-HiC_scaffold_6-snap-gene-784.6-mRNA-1	maker-HiC_scaffold_8-snap-gene-617.21-mRNA-1	0.12209	0.411594	0.296628
maker-HiC_scaffold_7-snap-gene-1011.20-mRNA-1	maker-HiC_scaffold_9-snap-gene-879.2-mRNA-1	0.103341	0.662508	0.155985
snap_masked-HiC_scaffold_7-processed-gene-1096.26-mRNA-1	maker-HiC_scaffold_9-snap-gene-1092.0-mRNA-1	0.158775	0.483717	0.328239

## Sheet: Table S9
Table S9. syngeneic CoR2R3-MYB genes in C. oleifera with Arabidopsis and poplar
Syngeneic CoR2R3-MYB gene ID (At&Co)	Syngeneic CoR2R3-MYB gene ID (Pt&Co)	Syngeneic CoR2R3-MYB gene ID (Pt&Co and At&Co)	Syngeneic CoR2R3-MYB gene ID (only in At&Co)	Syngeneic CoR2R3-MYB gene ID (only in Pt&Co)
maker-HiC_scaffold_10-snap-gene-1978.2-mRNA-1	maker-HiC_scaffold_1-snap-gene-1407.4-mRNA-1	maker-HiC_scaffold_10-snap-gene-1978.2-mRNA-1	maker-HiC_scaffold_10-snap-gene-2072.64-mRNA-1	maker-HiC_scaffold_1-snap-gene-1407.4-mRNA-1
maker-HiC_scaffold_11-snap-gene-1777.28-mRNA-1	snap_masked-HiC_scaffold_1-processed-gene-240.42-mRNA-1	maker-HiC_scaffold_11-snap-gene-1777.28-mRNA-1	maker-HiC_scaffold_13-snap-gene-1329.16-mRNA-1	maker-HiC_scaffold_1-snap-gene-2153.40-mRNA-1
maker-HiC_scaffold_12-snap-gene-173.3-mRNA-1	maker-HiC_scaffold_1-snap-gene-2153.40-mRNA-1	maker-HiC_scaffold_12-snap-gene-173.3-mRNA-1		maker-HiC_scaffold_10-snap-gene-1250.0-mRNA-1
maker-HiC_scaffold_12-snap-gene-396.17-mRNA-1	snap_masked-HiC_scaffold_1-processed-gene-39.14-mRNA-1	maker-HiC_scaffold_12-snap-gene-396.17-mRNA-1		maker-HiC_scaffold_10-snap-gene-1385.38-mRNA-1
maker-HiC_scaffold_13-snap-gene-410.3-mRNA-1	augustus_masked-HiC_scaffold_10-processed-gene-1783.11-mRNA-1	maker-HiC_scaffold_13-snap-gene-410.3-mRNA-1		augustus_masked-HiC_scaffold_10-processed-gene-442.21-mRNA-1
maker-HiC_scaffold_14-snap-gene-648.8-mRNA-1	snap_masked-HiC_scaffold_10-processed-gene-1143.20-mRNA-1	maker-HiC_scaffold_14-snap-gene-648.8-mRNA-1		maker-HiC_scaffold_11-snap-gene-1222.2-mRNA-1
maker-HiC_scaffold_15-snap-gene-797.11-mRNA-1	genemark-HiC_scaffold_10-processed-gene-2075.18-mRNA-1	maker-HiC_scaffold_15-snap-gene-797.11-mRNA-1		maker-HiC_scaffold_11-snap-gene-1234.2-mRNA-1
maker-HiC_scaffold_7-snap-gene-1011.20-mRNA-1	maker-HiC_scaffold_10-snap-gene-678.2-mRNA-1	maker-HiC_scaffold_7-snap-gene-1011.20-mRNA-1		maker-HiC_scaffold_11-snap-gene-199.32-mRNA-1
maker-HiC_scaffold_7-snap-gene-176.32-mRNA-1	maker-HiC_scaffold_10-snap-gene-1732.9-mRNA-1	maker-HiC_scaffold_7-snap-gene-176.32-mRNA-1		maker-HiC_scaffold_11-snap-gene-972.36-mRNA-1
maker-HiC_scaffold_7-snap-gene-991.4-mRNA-1	maker-HiC_scaffold_10-snap-gene-1376.7-mRNA-1	maker-HiC_scaffold_7-snap-gene-991.4-mRNA-1		maker-HiC_scaffold_12-snap-gene-1846.18-mRNA-1
snap_masked-HiC_scaffold_1-processed-gene-39.14-mRNA-1	maker-HiC_scaffold_10-snap-gene-1250.0-mRNA-1	snap_masked-HiC_scaffold_1-processed-gene-39.14-mRNA-1		maker-HiC_scaffold_12-snap-gene-631.18-mRNA-1
augustus_masked-HiC_scaffold_10-processed-gene-1783.11-mRNA-1	maker-HiC_scaffold_10-snap-gene-1975.30-mRNA-1	augustus_masked-HiC_scaffold_10-processed-gene-1783.11-mRNA-1		maker-HiC_scaffold_13-snap-gene-96.22-mRNA-1
snap_masked-HiC_scaffold_10-processed-gene-372.26-mRNA-1	maker-HiC_scaffold_10-snap-gene-1988.31-mRNA-1	snap_masked-HiC_scaffold_10-processed-gene-372.26-mRNA-1		maker-HiC_scaffold_13-snap-gene-90.22-mRNA-1
maker-HiC_scaffold_13-snap-gene-1063.5-mRNA-1	maker-HiC_scaffold_10-snap-gene-1385.38-mRNA-1	maker-HiC_scaffold_13-snap-gene-1063.5-mRNA-1		maker-HiC_scaffold_15-snap-gene-202.36-mRNA-1
maker-HiC_scaffold_2-snap-gene-21.38-mRNA-1	snap_masked-HiC_scaffold_10-processed-gene-372.26-mRNA-1	maker-HiC_scaffold_2-snap-gene-21.38-mRNA-1		maker-HiC_scaffold_15-snap-gene-824.27-mRNA-1
maker-HiC_scaffold_3-snap-gene-1647.2-mRNA-1	augustus_masked-HiC_scaffold_10-processed-gene-442.21-mRNA-1	maker-HiC_scaffold_3-snap-gene-1647.2-mRNA-1		maker-HiC_scaffold_2-snap-gene-1026.16-mRNA-1
maker-HiC_scaffold_6-snap-gene-880.29-mRNA-1	maker-HiC_scaffold_10-snap-gene-1978.2-mRNA-1	maker-HiC_scaffold_6-snap-gene-880.29-mRNA-1		genemark-HiC_scaffold_3-processed-gene-560.1-mRNA-1
maker-HiC_scaffold_6-snap-gene-784.6-mRNA-1	maker-HiC_scaffold_10-snap-gene-2037.31-mRNA-1	maker-HiC_scaffold_6-snap-gene-784.6-mRNA-1		augustus_masked-HiC_scaffold_3-processed-gene-155.9-mRNA-1
snap_masked-HiC_scaffold_1-processed-gene-240.42-mRNA-1	maker-HiC_scaffold_10-snap-gene-2020.38-mRNA-1	snap_masked-HiC_scaffold_1-processed-gene-240.42-mRNA-1		maker-HiC_scaffold_3-snap-gene-359.16-mRNA-1
maker-HiC_scaffold_10-snap-gene-2072.64-mRNA-1	snap_masked-HiC_scaffold_10-processed-gene-1123.48-mRNA-1	maker-HiC_scaffold_10-snap-gene-1732.9-mRNA-1		maker-HiC_scaffold_3-snap-gene-375.35-mRNA-1
maker-HiC_scaffold_10-snap-gene-1732.9-mRNA-1	maker-HiC_scaffold_11-snap-gene-1777.28-mRNA-1	maker-HiC_scaffold_10-snap-gene-1975.30-mRNA-1		maker-HiC_scaffold_3-snap-gene-58.1-mRNA-1
maker-HiC_scaffold_10-snap-gene-1975.30-mRNA-1	maker-HiC_scaffold_11-snap-gene-183.12-mRNA-1	maker-HiC_scaffold_10-snap-gene-2037.31-mRNA-1		maker-HiC_scaffold_4-snap-gene-58.17-mRNA-1
maker-HiC_scaffold_10-snap-gene-2037.31-mRNA-1	maker-HiC_scaffold_11-snap-gene-1222.2-mRNA-1	maker-HiC_scaffold_10-snap-gene-2020.38-mRNA-1		snap_masked-HiC_scaffold_4-processed-gene-45.24-mRNA-1
maker-HiC_scaffold_10-snap-gene-2020.38-mRNA-1	maker-HiC_scaffold_11-snap-gene-1234.2-mRNA-1	maker-HiC_scaffold_10-snap-gene-1988.31-mRNA-1		maker-HiC_scaffold_4-snap-gene-75.21-mRNA-1
maker-HiC_scaffold_10-snap-gene-1988.31-mRNA-1	maker-HiC_scaffold_11-snap-gene-199.32-mRNA-1	snap_masked-HiC_scaffold_10-processed-gene-1143.20-mRNA-1		maker-HiC_scaffold_4-snap-gene-1384.3-mRNA-1
snap_masked-HiC_scaffold_10-processed-gene-1143.20-mRNA-1	maker-HiC_scaffold_11-snap-gene-972.36-mRNA-1	maker-HiC_scaffold_12-snap-gene-963.18-mRNA-1		maker-HiC_scaffold_5-snap-gene-1158.13-mRNA-1
maker-HiC_scaffold_12-snap-gene-963.18-mRNA-1	maker-HiC_scaffold_12-snap-gene-963.18-mRNA-1	maker-HiC_scaffold_12-snap-gene-1194.8-mRNA-1		maker-HiC_scaffold_5-snap-gene-966.1-mRNA-1
maker-HiC_scaffold_12-snap-gene-1194.8-mRNA-1	maker-HiC_scaffold_12-snap-gene-1194.8-mRNA-1	maker-HiC_scaffold_13-snap-gene-1034.5-mRNA-1		maker-HiC_scaffold_5-snap-gene-301.9-mRNA-1
maker-HiC_scaffold_13-snap-gene-1034.5-mRNA-1	maker-HiC_scaffold_12-snap-gene-1846.18-mRNA-1	maker-HiC_scaffold_3-snap-gene-1770.5-mRNA-1		augustus_masked-HiC_scaffold_5-processed-gene-376.4-mRNA-1
maker-HiC_scaffold_13-snap-gene-1329.16-mRNA-1	maker-HiC_scaffold_12-snap-gene-631.18-mRNA-1	maker-HiC_scaffold_3-snap-gene-205.3-mRNA-1		maker-HiC_scaffold_6-snap-gene-549.25-mRNA-1
maker-HiC_scaffold_3-snap-gene-1770.5-mRNA-1	maker-HiC_scaffold_12-snap-gene-396.17-mRNA-1	maker-HiC_scaffold_5-snap-gene-325.4-mRNA-1		maker-HiC_scaffold_6-snap-gene-512.7-mRNA-1
maker-HiC_scaffold_3-snap-gene-205.3-mRNA-1	maker-HiC_scaffold_12-snap-gene-173.3-mRNA-1	maker-HiC_scaffold_6-snap-gene-1082.22-mRNA-1		maker-HiC_scaffold_7-snap-gene-124.2-mRNA-1
maker-HiC_scaffold_5-snap-gene-325.4-mRNA-1	maker-HiC_scaffold_12-snap-gene-179.51-mRNA-1	maker-HiC_scaffold_7-snap-gene-46.3-mRNA-1		snap_masked-HiC_scaffold_7-processed-gene-1096.26-mRNA-1
maker-HiC_scaffold_6-snap-gene-1082.22-mRNA-1	maker-HiC_scaffold_13-snap-gene-96.22-mRNA-1	maker-HiC_scaffold_9-snap-gene-879.2-mRNA-1		maker-HiC_scaffold_7-snap-gene-171.44-mRNA-1
maker-HiC_scaffold_7-snap-gene-46.3-mRNA-1	maker-HiC_scaffold_13-snap-gene-1063.5-mRNA-1	maker-HiC_scaffold_9-snap-gene-109.0-mRNA-1		maker-HiC_scaffold_7-snap-gene-946.32-mRNA-2
maker-HiC_scaffold_9-snap-gene-879.2-mRNA-1	maker-HiC_scaffold_13-snap-gene-1034.5-mRNA-1	maker-HiC_scaffold_14-snap-gene-768.53-mRNA-1		maker-HiC_scaffold_7-snap-gene-956.15-mRNA-1
maker-HiC_scaffold_9-snap-gene-109.0-mRNA-1	maker-HiC_scaffold_13-snap-gene-410.3-mRNA-1	maker-HiC_scaffold_14-snap-gene-826.2-mRNA-1		maker-HiC_scaffold_8-snap-gene-432.15-mRNA-1
maker-HiC_scaffold_14-snap-gene-768.53-mRNA-1	maker-HiC_scaffold_13-snap-gene-90.22-mRNA-1	maker-HiC_scaffold_15-snap-gene-277.6-mRNA-1		maker-HiC_scaffold_9-snap-gene-74.16-mRNA-1
maker-HiC_scaffold_14-snap-gene-826.2-mRNA-1	maker-HiC_scaffold_14-snap-gene-648.8-mRNA-1	maker-HiC_scaffold_2-snap-gene-433.32-mRNA-1		maker-HiC_scaffold_9-snap-gene-1092.0-mRNA-1
maker-HiC_scaffold_15-snap-gene-277.6-mRNA-1	maker-HiC_scaffold_14-snap-gene-768.53-mRNA-1	maker-HiC_scaffold_4-snap-gene-1364.13-mRNA-1		maker-HiC_scaffold_9-snap-gene-718.16-mRNA-1
maker-HiC_scaffold_2-snap-gene-433.32-mRNA-1	maker-HiC_scaffold_14-snap-gene-826.2-mRNA-1	maker-HiC_scaffold_4-snap-gene-477.0-mRNA-1
maker-HiC_scaffold_4-snap-gene-1364.13-mRNA-1	maker-HiC_scaffold_15-snap-gene-277.6-mRNA-1	genemark-HiC_scaffold_10-processed-gene-2075.18-mRNA-1
maker-HiC_scaffold_4-snap-gene-477.0-mRNA-1	maker-HiC_scaffold_15-snap-gene-202.36-mRNA-1	snap_masked-HiC_scaffold_10-processed-gene-1123.48-mRNA-1
genemark-HiC_scaffold_10-processed-gene-2075.18-mRNA-1	maker-HiC_scaffold_15-snap-gene-797.11-mRNA-1	maker-HiC_scaffold_10-snap-gene-1376.7-mRNA-1
snap_masked-HiC_scaffold_10-processed-gene-1123.48-mRNA-1	maker-HiC_scaffold_15-snap-gene-824.27-mRNA-1	maker-HiC_scaffold_10-snap-gene-678.2-mRNA-1
maker-HiC_scaffold_10-snap-gene-1376.7-mRNA-1	maker-HiC_scaffold_2-snap-gene-1882.24-mRNA-1	maker-HiC_scaffold_11-snap-gene-183.12-mRNA-1
maker-HiC_scaffold_10-snap-gene-678.2-mRNA-1	maker-HiC_scaffold_2-snap-gene-21.38-mRNA-1	maker-HiC_scaffold_12-snap-gene-179.51-mRNA-1
maker-HiC_scaffold_11-snap-gene-183.12-mRNA-1	maker-HiC_scaffold_2-snap-gene-433.32-mRNA-1	maker-HiC_scaffold_2-snap-gene-1882.24-mRNA-1
maker-HiC_scaffold_12-snap-gene-179.51-mRNA-1	maker-HiC_scaffold_2-snap-gene-1026.16-mRNA-1	maker-HiC_scaffold_3-snap-gene-1264.29-mRNA-1
maker-HiC_scaffold_2-snap-gene-1882.24-mRNA-1	maker-HiC_scaffold_3-snap-gene-205.3-mRNA-1	maker-HiC_scaffold_5-snap-gene-54.1-mRNA-1
maker-HiC_scaffold_3-snap-gene-1264.29-mRNA-1	genemark-HiC_scaffold_3-processed-gene-560.1-mRNA-1	maker-HiC_scaffold_6-snap-gene-607.20-mRNA-1
maker-HiC_scaffold_5-snap-gene-54.1-mRNA-1	augustus_masked-HiC_scaffold_3-processed-gene-155.9-mRNA-1	maker-HiC_scaffold_8-snap-gene-617.21-mRNA-1
maker-HiC_scaffold_6-snap-gene-607.20-mRNA-1	maker-HiC_scaffold_3-snap-gene-359.16-mRNA-1
maker-HiC_scaffold_8-snap-gene-617.21-mRNA-1	maker-HiC_scaffold_3-snap-gene-375.35-mRNA-1
	maker-HiC_scaffold_3-snap-gene-58.1-mRNA-1
	maker-HiC_scaffold_3-snap-gene-1647.2-mRNA-1
	maker-HiC_scaffold_3-snap-gene-1770.5-mRNA-1
	maker-HiC_scaffold_3-snap-gene-1264.29-mRNA-1
	maker-HiC_scaffold_4-snap-gene-58.17-mRNA-1
	snap_masked-HiC_scaffold_4-processed-gene-45.24-mRNA-1
	maker-HiC_scaffold_4-snap-gene-75.21-mRNA-1
	maker-HiC_scaffold_4-snap-gene-1364.13-mRNA-1
	maker-HiC_scaffold_4-snap-gene-477.0-mRNA-1
	maker-HiC_scaffold_4-snap-gene-1384.3-mRNA-1
	maker-HiC_scaffold_5-snap-gene-1158.13-mRNA-1
	maker-HiC_scaffold_5-snap-gene-54.1-mRNA-1
	maker-HiC_scaffold_5-snap-gene-966.1-mRNA-1
	maker-HiC_scaffold_5-snap-gene-301.9-mRNA-1
	maker-HiC_scaffold_5-snap-gene-325.4-mRNA-1
	augustus_masked-HiC_scaffold_5-processed-gene-376.4-mRNA-1
	maker-HiC_scaffold_6-snap-gene-1082.22-mRNA-1
	maker-HiC_scaffold_6-snap-gene-880.29-mRNA-1
	maker-HiC_scaffold_6-snap-gene-784.6-mRNA-1
	maker-HiC_scaffold_6-snap-gene-549.25-mRNA-1
	maker-HiC_scaffold_6-snap-gene-607.20-mRNA-1
	maker-HiC_scaffold_6-snap-gene-512.7-mRNA-1
	maker-HiC_scaffold_7-snap-gene-124.2-mRNA-1
	snap_masked-HiC_scaffold_7-processed-gene-1096.26-mRNA-1
	maker-HiC_scaffold_7-snap-gene-171.44-mRNA-1
	maker-HiC_scaffold_7-snap-gene-946.32-mRNA-2
	maker-HiC_scaffold_7-snap-gene-956.15-mRNA-1
	maker-HiC_scaffold_7-snap-gene-991.4-mRNA-1
	maker-HiC_scaffold_7-snap-gene-1011.20-mRNA-1
	maker-HiC_scaffold_7-snap-gene-46.3-mRNA-1
	maker-HiC_scaffold_7-snap-gene-176.32-mRNA-1
	maker-HiC_scaffold_8-snap-gene-432.15-mRNA-1
	maker-HiC_scaffold_8-snap-gene-617.21-mRNA-1
	maker-HiC_scaffold_9-snap-gene-74.16-mRNA-1
	maker-HiC_scaffold_9-snap-gene-109.0-mRNA-1
	maker-HiC_scaffold_9-snap-gene-1092.0-mRNA-1
	maker-HiC_scaffold_9-snap-gene-718.16-mRNA-1
	maker-HiC_scaffold_9-snap-gene-879.2-mRNA-1

## Sheet: Table S10
Table S10. The number of the R2R3-MYB members in subgroups
Subgroup	Number of AtR2R3-MYBs	Number of CoR2R3-MYBs
S1	5	4
S2	3	10
S3	2	0
S4	6	4
S5	1	1
S6	4	1
S7	3	1
S8	2	1
S9	3	5
S10	2	0
S11	3	5
S12	6	0
S13	4	2
S14	6	6
S15	3	0
S16	3	1
S17	2	2
S18	7	3
S19	2	0
S20	6	4
S21	8	8
S22	4	5
S23	3	3
S24	3	5
S25	9	13

[truncated: 4 more sheets: Table S11, Table S12, Table S13, Table S14]
